# Supplementary material for: Profiling of peptides from wet- and dry-heated milk proteins after in vitro infant digestion and intestinal transport, and their effects on mucus production and innate immunity
Source: Royal Society of Chemistry journal article supplement (doi:10.1039/d5fo02883c), 2025-12-17
Supplement: d5fo02883c1.pdf [file d5fo02883c1.pdf]

## 1 **Supplementary information**

### 2 **Materials & Methods**

#### 3 **Materials**

4 Raw whole bovine milk was provided by CARUS Farm from Wageningen University & Research.  
5 NuPAGE 4 to 12% Bis-Tris protein gel, NuPAGE LDS sample buffer (4x), NuPAGE sample reducing  
6 agent (10X) and NuPAGE MES SDS running buffer (20X) were purchased from Thermo Fisher  
7 Scientific. BlueRay prestained protein marker was obtained from Jena Bioscience.

#### 8 **Reducing SDS-PAGE**

9 Reducing SDS-PAGE was performed to determine the protein composition before and after filtration  
10 of the intestinal digests. Raw, undigested skim milk was measured as a reference. First, undigested  
11 skim milk was diluted seven times with Milli-Q water. Then, 4 µl intestinal digest, filtered intestinal  
12 digest or diluted skim milk was mixed with 5 µl 4x LDS sample buffer, 2 µl 10x reducing agent, and  
13 9 µl Milli-Q water. Samples were heated at 70°C for 10 min, and 10 µl of each sample and 4 µl  
14 marker were loaded on a 4-12% Bis-Tris polyacrylamide precast gel. Gels were run at 120V for 75  
15 min with MES running buffer, and stained with Coomassie brilliant blue solution for 2h, and  
16 destained with 10% ethanol and 7.5% acetic acid in demi water. The gels were scanned with a GS-  
17 900 Calibrated Densitometer (Bio-Rad) with Image Lab software (Bio-Rad).

#### 18 **Protein concentration**

19 Protein concentrations of the intestinal digests before and after filtration were measured by  
20 DUMAS. Total nitrogen content of the samples was determined with a DUMAS Flash EA 1112  
21 Protein analyzer (Thermo Fisher Scientific), and nitrogen content was converted to protein  
22 concentration with a conversion factor of 6.38.

#### 23 **2.1 Mucus staining**

24 Mucins produced by Caco-2 and HT29-MTX-E12 cells were stained and visualized by Alcian Blue  
25 followed by a PAS staining using either an ethanol or Carnoy's fixation. Alcian blue stains acidic  
26 mucins, while PAS stains neutral mucins.

#### 27 **Fixation in Carnoy's or ethanol solution**

28 Caco-2 and HT29-MTX cells were co-cultured on inserts in ratio's 100:0 and 90:10. For each ratio, a  
29 duplo set of inserts were seeded as described previously in section 2.8. After 21 days of growth on  
30 inserts, the medium was removed by turning the inserts upside down in a Petri dish and droplets still  
31 present were removed carefully by pipetting. To one set of inserts (n=1), 200 µl fresh Carnoy's  
32 solution (60% ethanol, 30% chloroform, 10% acetic acid) was added and inserts were incubated for  
33 30 min at RT. After removing the fixative by pipetting, 200 µl of PBS was added and inserts were  
34 stored at 4°C in a plate until staining, wrapped shut with parafilm to prevent evaporation.

35 The second set of inserts (n=1) were fixated in ice-cold ethanol (-20°C). Medium was removed as  
36 described above and 200µl of ethanol was added and inserts were incubated for 30 min at RT. The

37 fixative was removed by pipetting and 200 µl of PBS was added. Inserts were stored at 4°C in a  
38 plate wrapped shut with parafilm until staining.

### 39 **Alcian Blue/PAS staining**

40 All stored inserts (fixated either in Carnoy's or ethanol solution) were carefully washed by adding  
41 150 µl distilled water apical and 750 µl basolateral, and removing it by pipetting. Then, Alcian Blue  
42 solution (1g Alcian Blue 8GX in 100 ml 3% Acetic Acid Solution, set to pH 2.5) was added to both  
43 compartments (apical 150 µL; basolateral 750 µL) and inserts were incubated for 5 min at RT.  
44 Inserts were tapped upside down to remove the Alcian Blue staining and washed by dipping twice  
45 in demi water. Then, the inserts were thoroughly washed by keeping them under running tap water  
46 for 3 min. Inserts were dipped once more in demi water. Subsequently, inserts were tapped dry  
47 and transferred to a clean 24-well plate. For all inserts, Alcian Blue staining was followed by  
48 periodic acid staining to visualize both acid and neutral mucins in the same insert. Periodic Acid  
49 solution 1 (PAS staining kit) was added to both compartments (apical 150 µL; basolateral 750 µL)  
50 and inserts were incubated for 10 min at RT. Periodic acid staining was removed by tapping upside  
51 down and inserts were again washed as described previously. Inserts were incubated with Schiff's  
52 reagent (solution 2; apical 150 µL; basolateral 750 µL) for 15 min at RT. After removing the  
53 Schiff's reagent by tapping upside down, inserts were again washed as described previously. To  
54 enhance the specificity of the staining, inserts were washed 3 times with sulfite water (10ml of  
55 10% Sodium Bisulfite solution, 10ml of 1M HCl, 200ml tap water) for 2 min. Stained membranes  
56 were removed from the inserts using a small scalpel blade and place cells side-up onto a glass  
57 slide, and sealed with DPX mounting medium under a cover glass. Slides were kept in the fume  
58 hood overnight to harden, covered by aluminum foil.

59 The slides were analyzed using the widefield light microscope Axioskop with Olympus XC30 camera  
60 (Zeiss, Germany). All pictures taken with 10x magnification (lens aperture 0.25) using the CellSens  
61 Entry software version 1.16 (Olympus Scientific solutions/ Evident Scientific; Hamburg, Germany).  
62 Per insert, 4 images were taken, one from each quartile and representative images are shown in  
63 Figure S6.

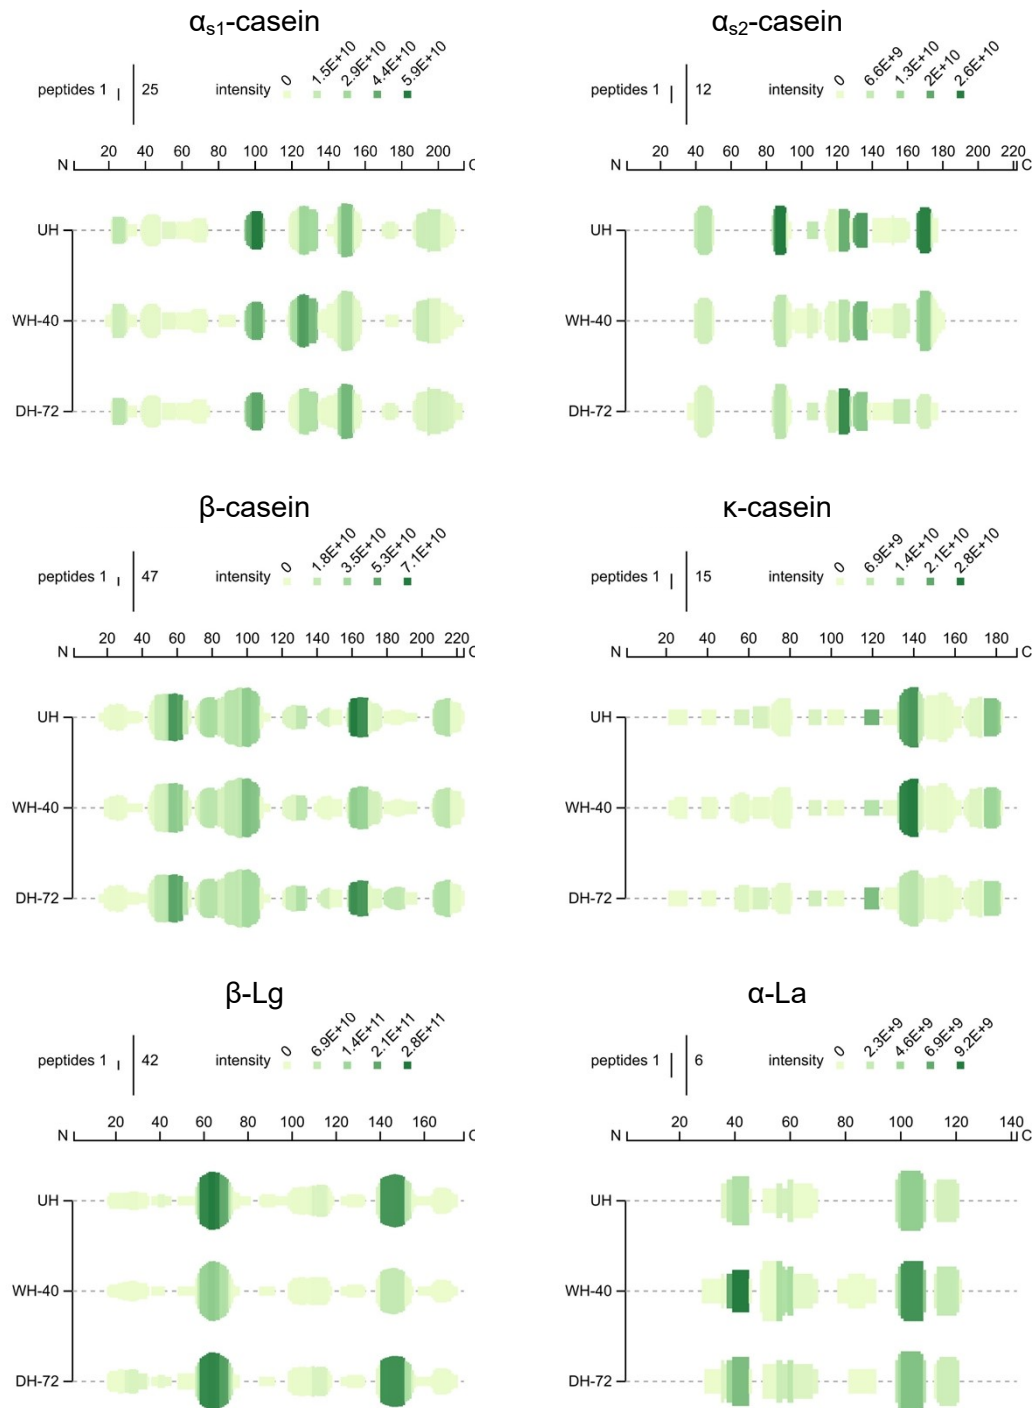

Figure S1: Peptide alignment for  $\alpha_{s1}$ -casein,  $\alpha_{s2}$ -casein,  $\beta$ -casein,  $\kappa$ -casein,  $\beta$ -lactoglobulin ( $\beta$ -Lg), and  $\alpha$ -lactalbumin ( $\alpha$ -La) detected with LC-MS/MS in the filtered intestinal digests (n=3). An infant formula model system remained either unheated (UH), was wet heated for 40 min (WH-40) or dry heated for 72h (DH-72) and all samples were digested by use of an *in vitro* infant digestion model. The color of the bars represents the sum of peptide intensities that overlap at this position, and the height of the bars represents the number of peptides (peptide count) that overlap at this position. The amino acid position is given including the signal peptides of 15, 15, 15, 21, 16, and 19 amino acids for  $\alpha_{s1}$ -casein,  $\alpha_{s2}$ -casein,  $\beta$ -casein,  $\kappa$ -casein,  $\beta$ -Lg, and  $\alpha$ -La, respectively.

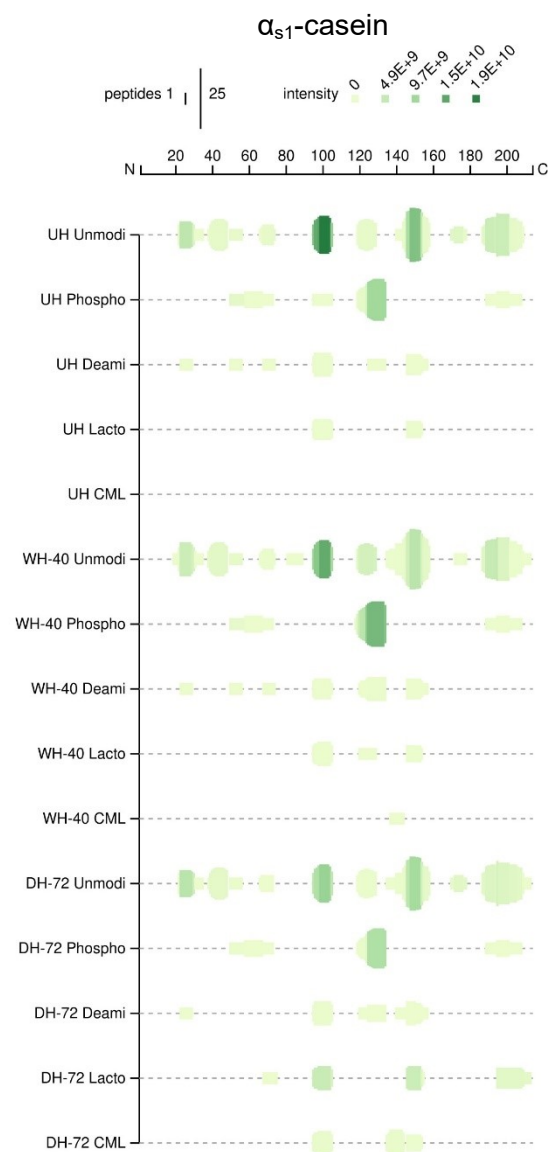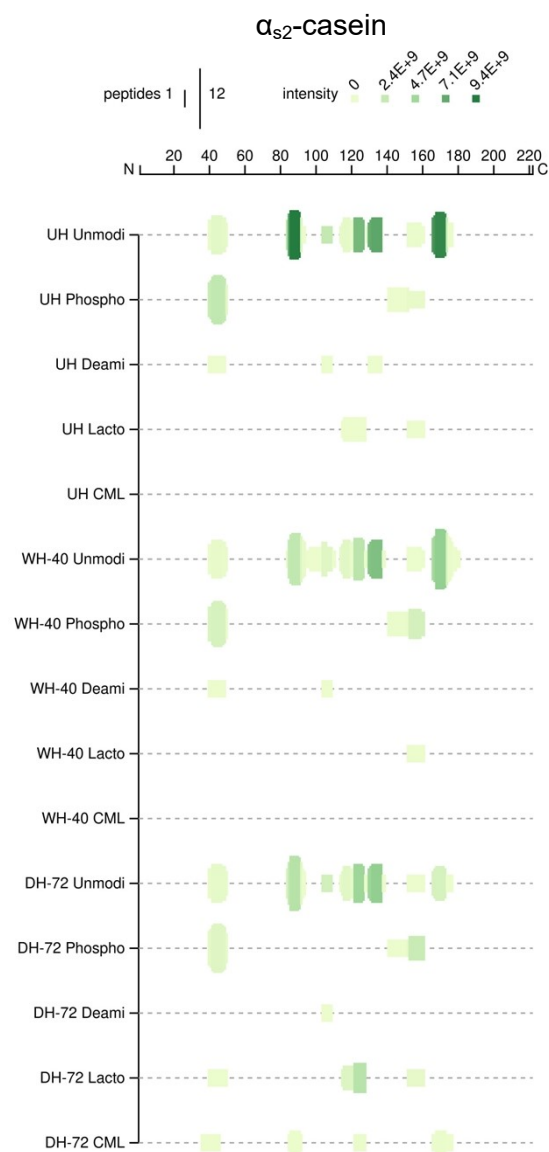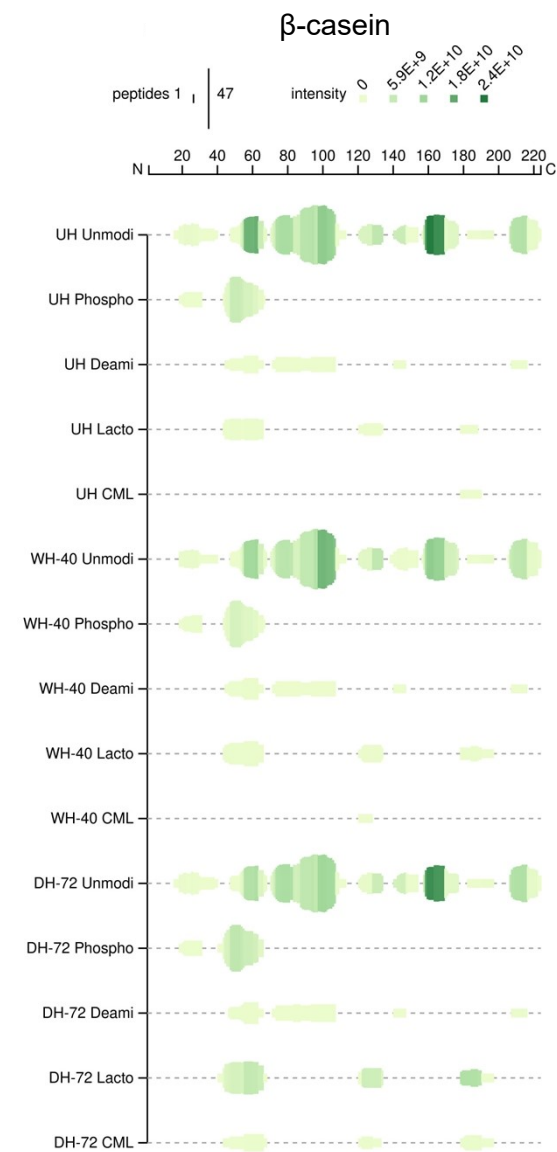

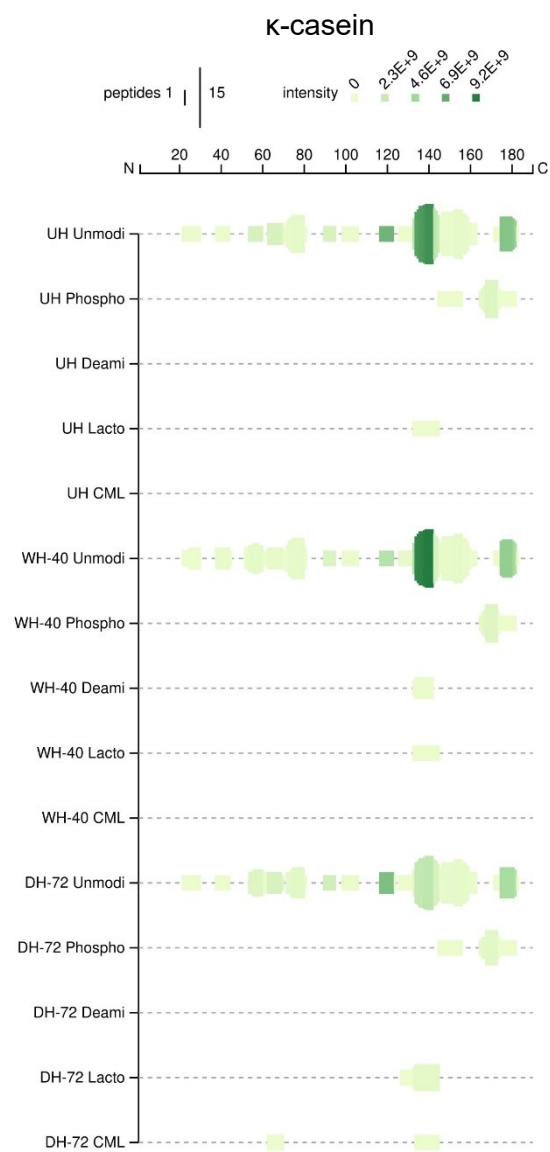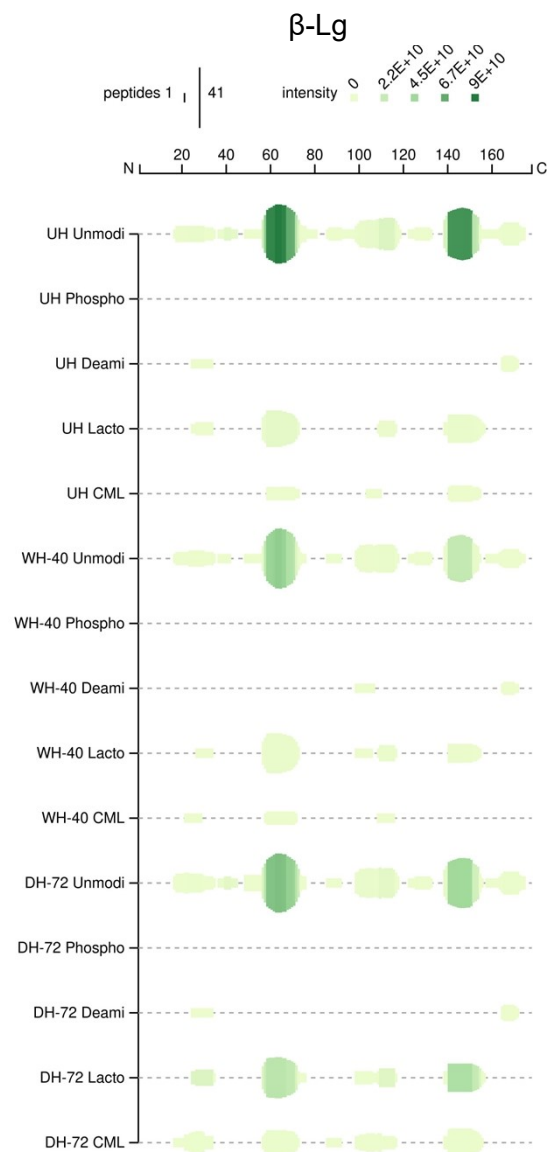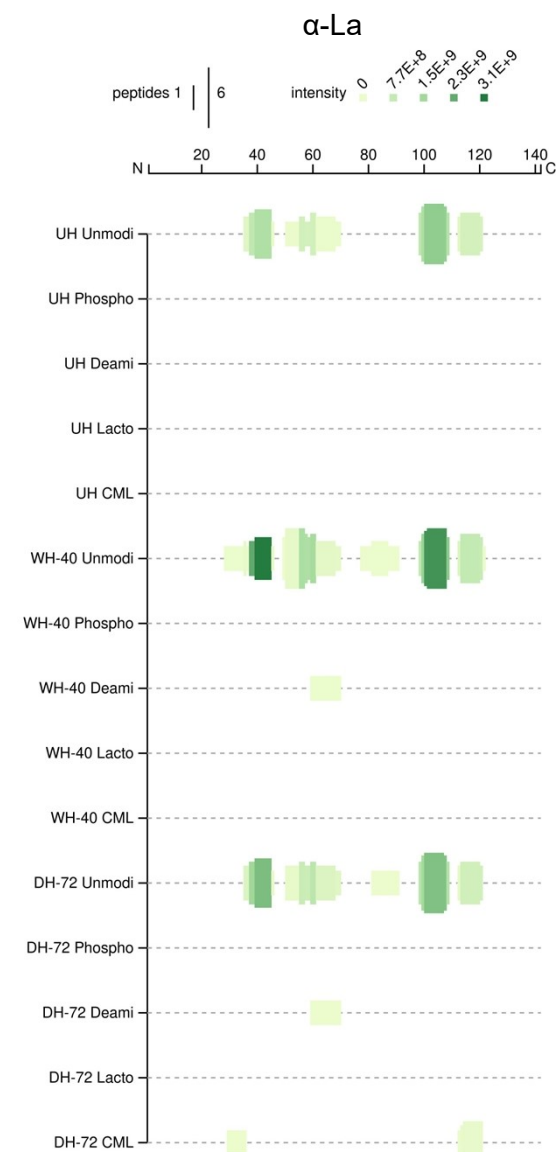

Figure S2: Peptide alignment for  $\alpha_{S1}$ -casein,  $\alpha_{S2}$ -casein,  $\beta$ -casein,  $\kappa$ -casein,  $\beta$ -lactoglobulin ( $\beta$ -Lg), and  $\alpha$ -lactalbumin ( $\alpha$ -La) detected with LC-MS/MS in the filtered intestinal digests. An infant formula model system remained either unheated (UH), was wet heated for 40 min (WH-40) or dry heated for 72h (DH-72) and all samples were digested by use of an *in vitro* infant digestion model (n=3). Peptide alignments are shown separately for unmodified (Unmodi), phosphorylated (Phospho), deamidation (Deami) modified, lactosylated (Lacto) and carboxymethyllysine (CML) modified peptides. The color of the bars represents the sum of peptide intensities that overlap at this position, and the height of the bars represents the number of peptides (peptide count) that overlap at this position. The amino acid position is given including the signal peptides of 15, 15, 15, 21, 16, and 19 amino acids for  $\alpha_{S1}$ -casein,  $\alpha_{S2}$ -casein,  $\beta$ -casein,  $\kappa$ -casein,  $\beta$ -Lg, and  $\alpha$ -La, respectively.

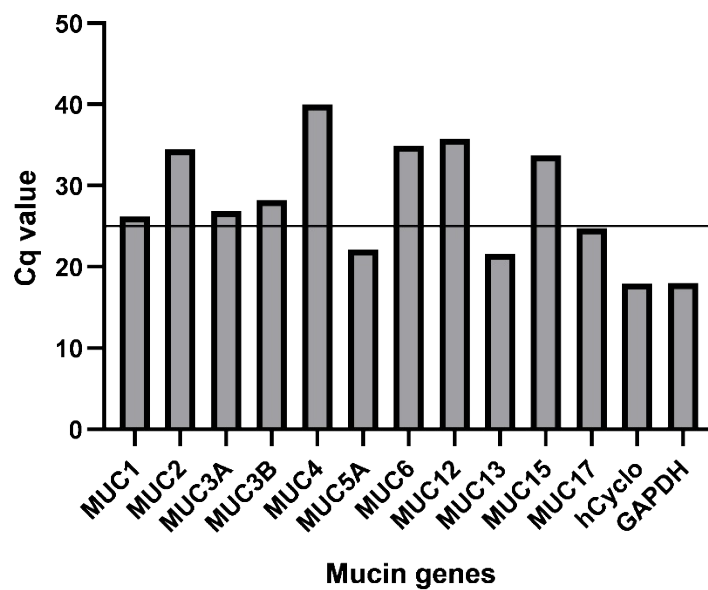

Figure S3: Expression levels of mucin genes measured by qPCR in HT29-MTX-E12 cells (n=1, average of technical duplo). qPCR was performed as described in the materials & methods (section 2.7). Primer details are indicated in Table S1.

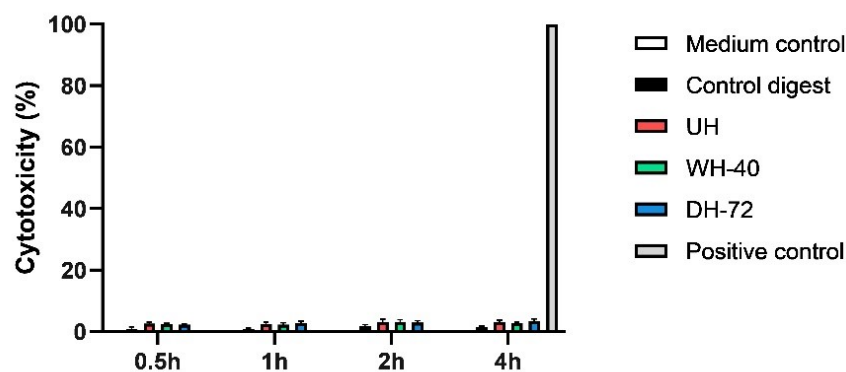

Figure S4: Cytotoxicity effects on HT29-MTX-E12 cells after exposure to the filtered intestinal digests for the mucin gene expression and mucus production experiments as measured with the LDH assay (n=3). An infant formula model system remained either unheated (UH), was wet heated for 40 min (WH-40) or dry heated for 72h (DH-72) and all samples were digested by use of an *in vitro* infant digestion model and filtered before the intestinal digests were applied to the HT29-MTX-E12 cells for 0.5-4h. Water instead of the infant formula model system was digested with the *in vitro* digestion model to obtain a control digest. Medium control was HT29-MTX-E12 cells exposed to DMEM, and was set to 0%. The LDH positive control 2% Triton X100 releases the maximum amount of LDH present within the HT29-MTX-E12 cells, and was set at 100%. Error bars represent standard deviation.

(a)

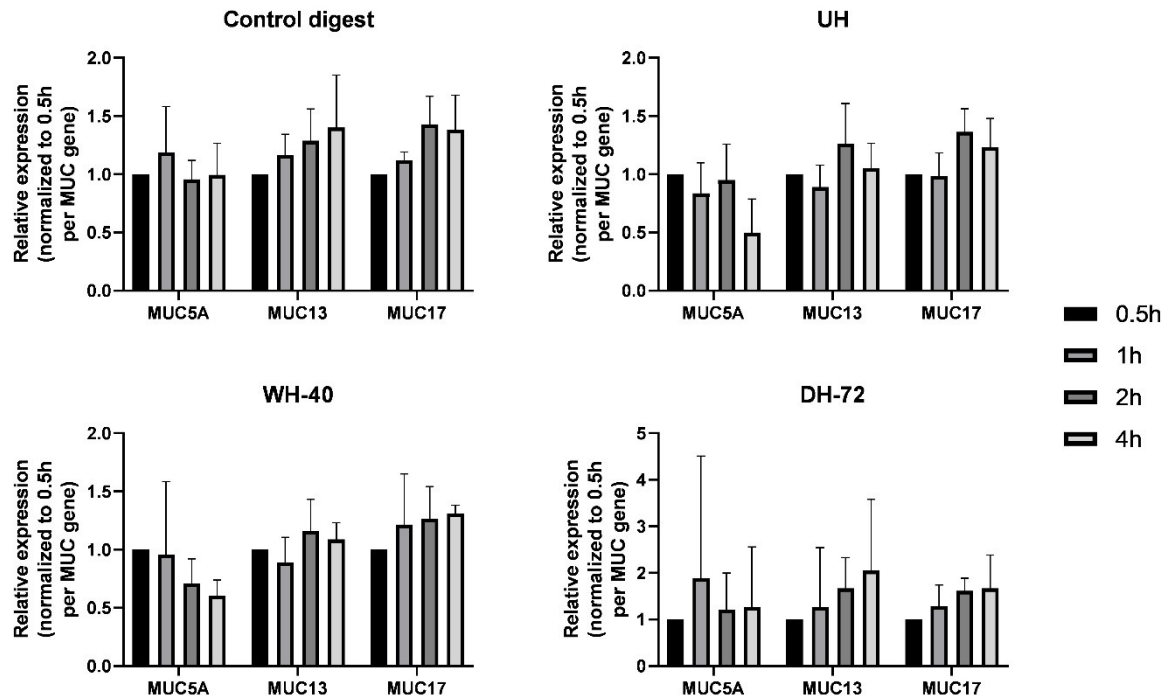

(b)

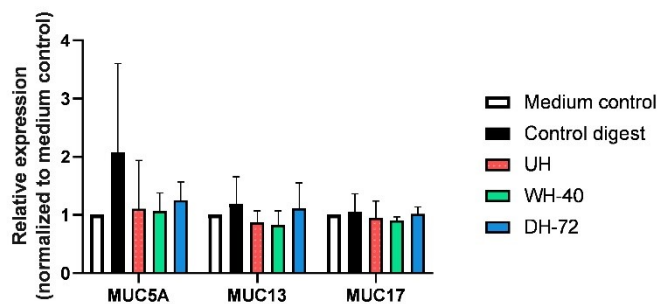

Figure S5: Mucin gene expression after application of the filtered intestinal digests to HT29-MTX-E12 cells (n=3). (a) Mucin gene expression after 0.5, 1, 2, or 4h relative to the 0.5h time point for each MUC gene and digest. (b) Mucin gene expression after 4h relative to the medium control for each MUC gene. An infant formula model system remained either unheated (UH), was wet heated for 40 min (WH-40) or dry heated for 72h (DH-72), and all samples were digested by use of an *in vitro* infant digestion model. Water instead of the infant formula model system was digested with the *in vitro* digestion model to obtain a control digest. Medium control were HT29-MTX-E12 cells exposed to Dulbecco's Modified Eagle Medium (DMEM). No statistical differences were found between the medium control, control digest, and milk digest samples. Error bars represent standard deviation.



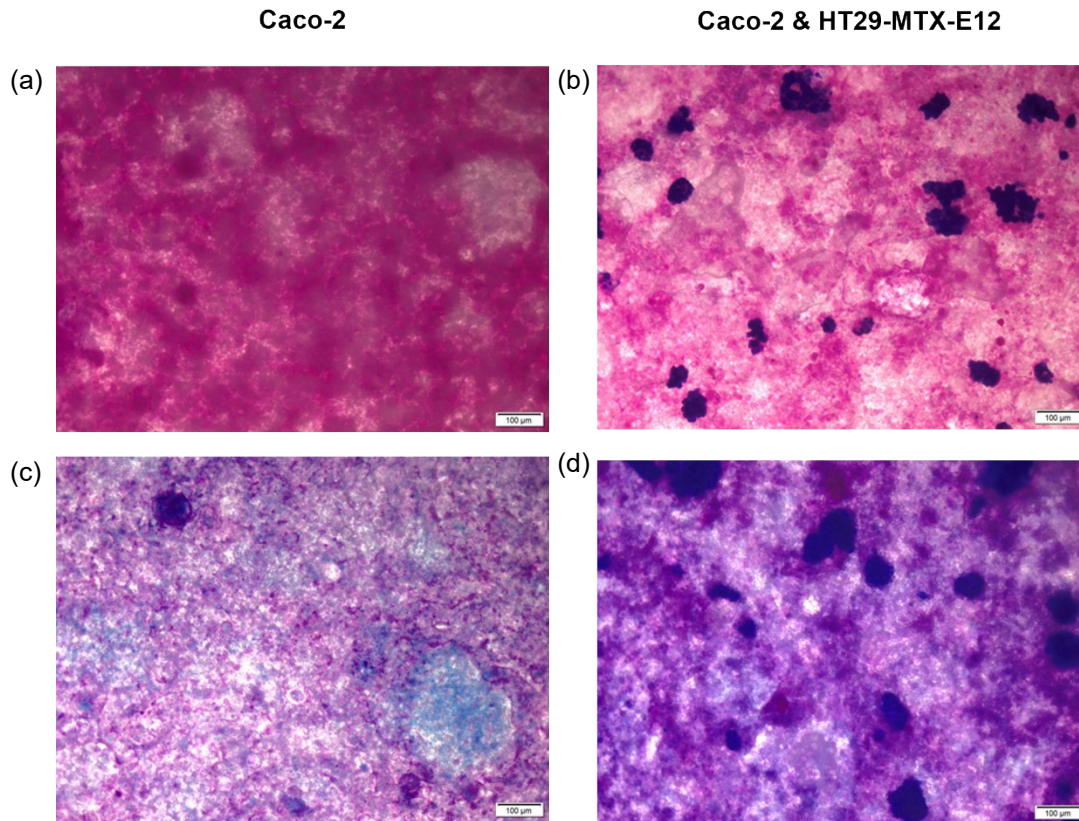

Figure S6: Representative images of mucus staining by Alcian Blue followed by PAS staining. Caco-2 and Caco-2/HT29-MTX-E12 cells (90:10) were co-cultured on Transwell™ inserts for 21 days, and stained with Alcian Blue (staining of acidic muco-substances as light blue) and PAS staining (staining of neutral muco-substances as deep red magenta). Cells that contain both neutral and acidic mucins will stain varying shades of purple due to the combination of binding of alcian blue and the reactivity with Schiff reagent (Suvarna et al., 2018). Bars, 100µm. A-B: Inserts fixated with Carnoy's solution before Alcian Blue/PAS staining; Carnoy's solution preserves well the neutral mucins within the monolayers. C-D: Inserts fixated with ethanol before Alcian Blue/PAS staining; Ethanol removes part of the neutral mucins, allowing staining of acidic mucins underneath.

(a)

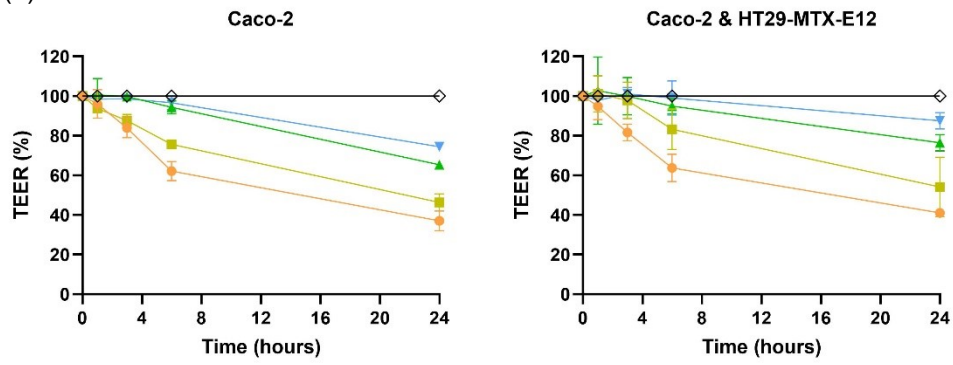

(b)

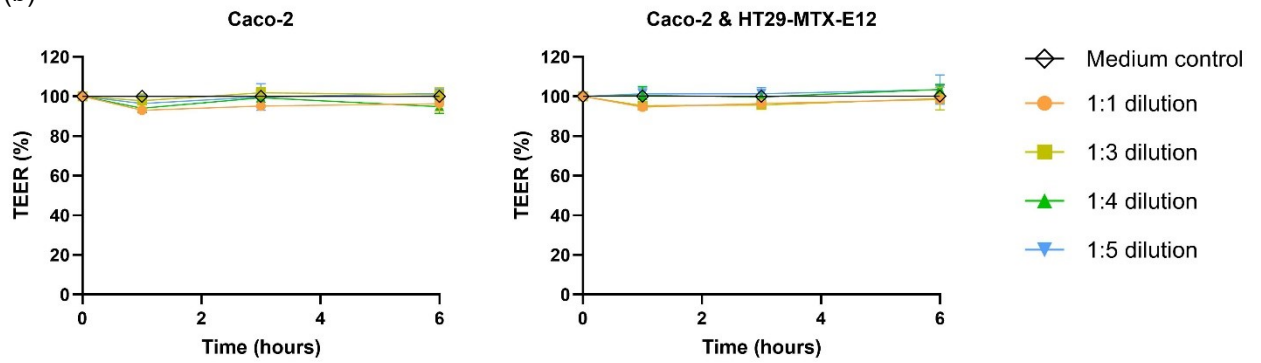

(c)

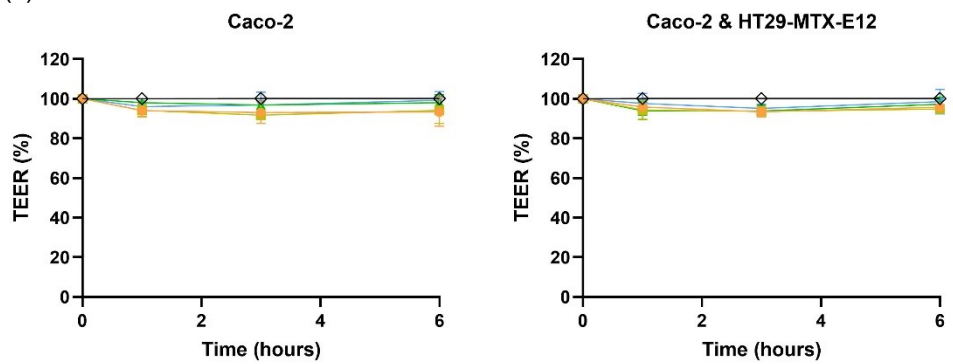

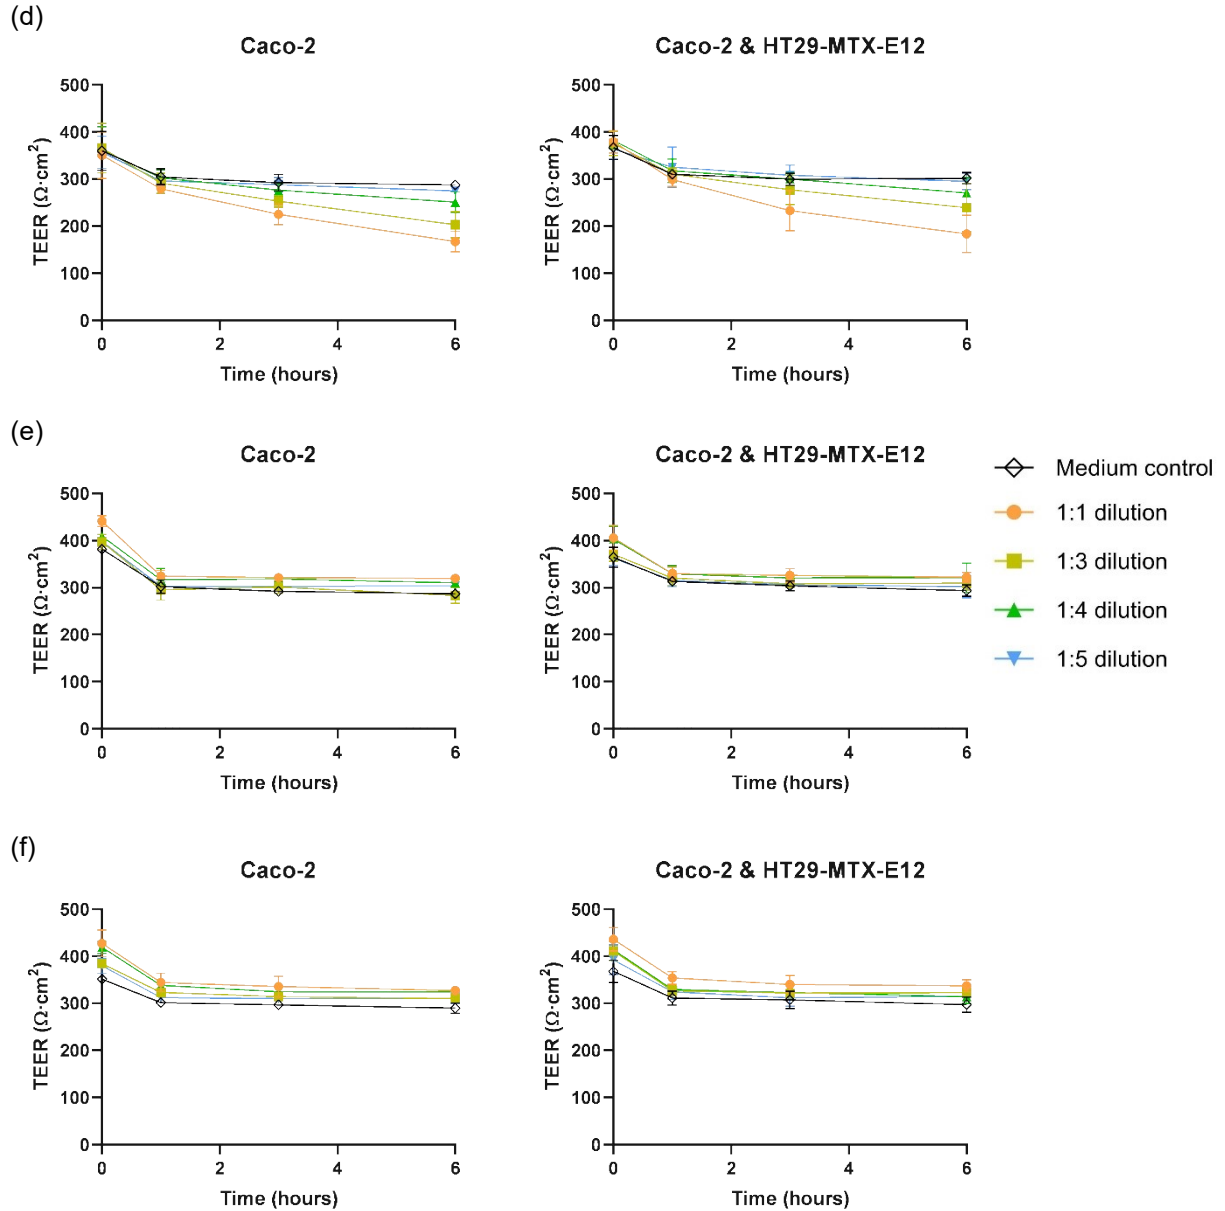

Figure S7: Transepithelial electrical resistance (TEER) values after intestinal digests, diluted at ratios from 1:1 to 1:5 in DMEM (without FBS), were applied to the apical side of the 21-days differentiated Caco-2 and Caco-2/HT29-MTX-E12 monolayers (n=3). Relative TEER values of (a) Not filtered control digest, (b) Filtered control digest, (c) Filtered unheated (UH) infant formula model system, and absolute TEER values of (d) Not filtered control digest, (e) Filtered control digest, (f) Filtered unheated (UH) infant formula model system. All samples were digested by use of an *in vitro* infant digestion model before the intestinal digests were applied to the Caco-2 and HT29-MTX-E12 cells. Water instead of the infant formula model system was digested with the *in vitro* digestion model to obtain a control digest. Medium control were Caco-2 and HT29-MTX-E12 cells exposed to DMEM. Error bars represent standard deviation.

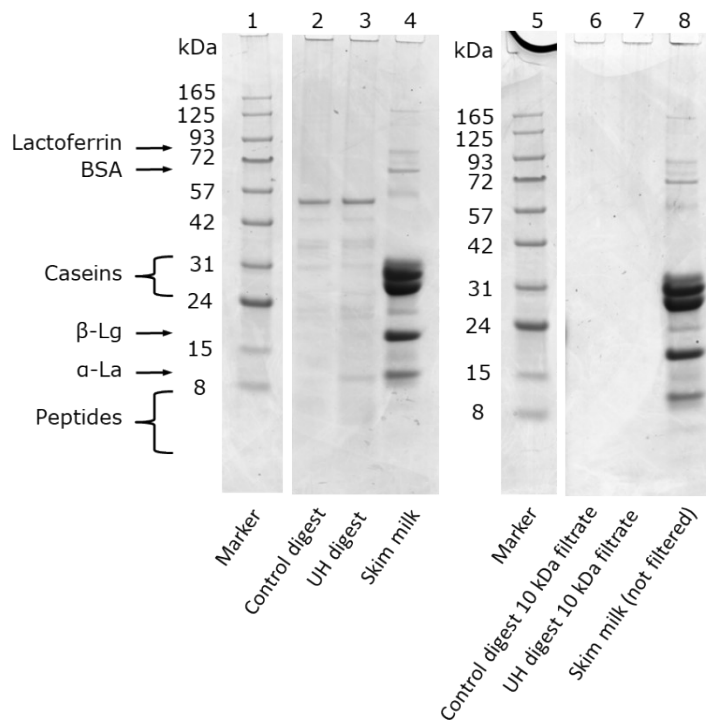

Figure S8: Reducing SDS-PAGE of intestinal digests before and after filtration of the digests by centrifugal filtration with a 10 kDa molecular weight cut off. An infant formula model system remained unheated (UH) and was digested by use of an *in vitro* infant digestion model. Water instead of the infant formula model system was digested with the *in vitro* digestion model to obtain a control digest. Undigested, not filtered raw skim milk was measured as a control. Lane 1: marker, lane 2: control digest (not filtered), lane 3: UH digest (not filtered), lane 4: skim milk (undigested, not filtered), lane 5: marker, lane 6: 10 kDa filtrate of control digest, lane 7: 10 kDa filtrate of UH digest, lane 8: skim milk (undigested, not filtered).

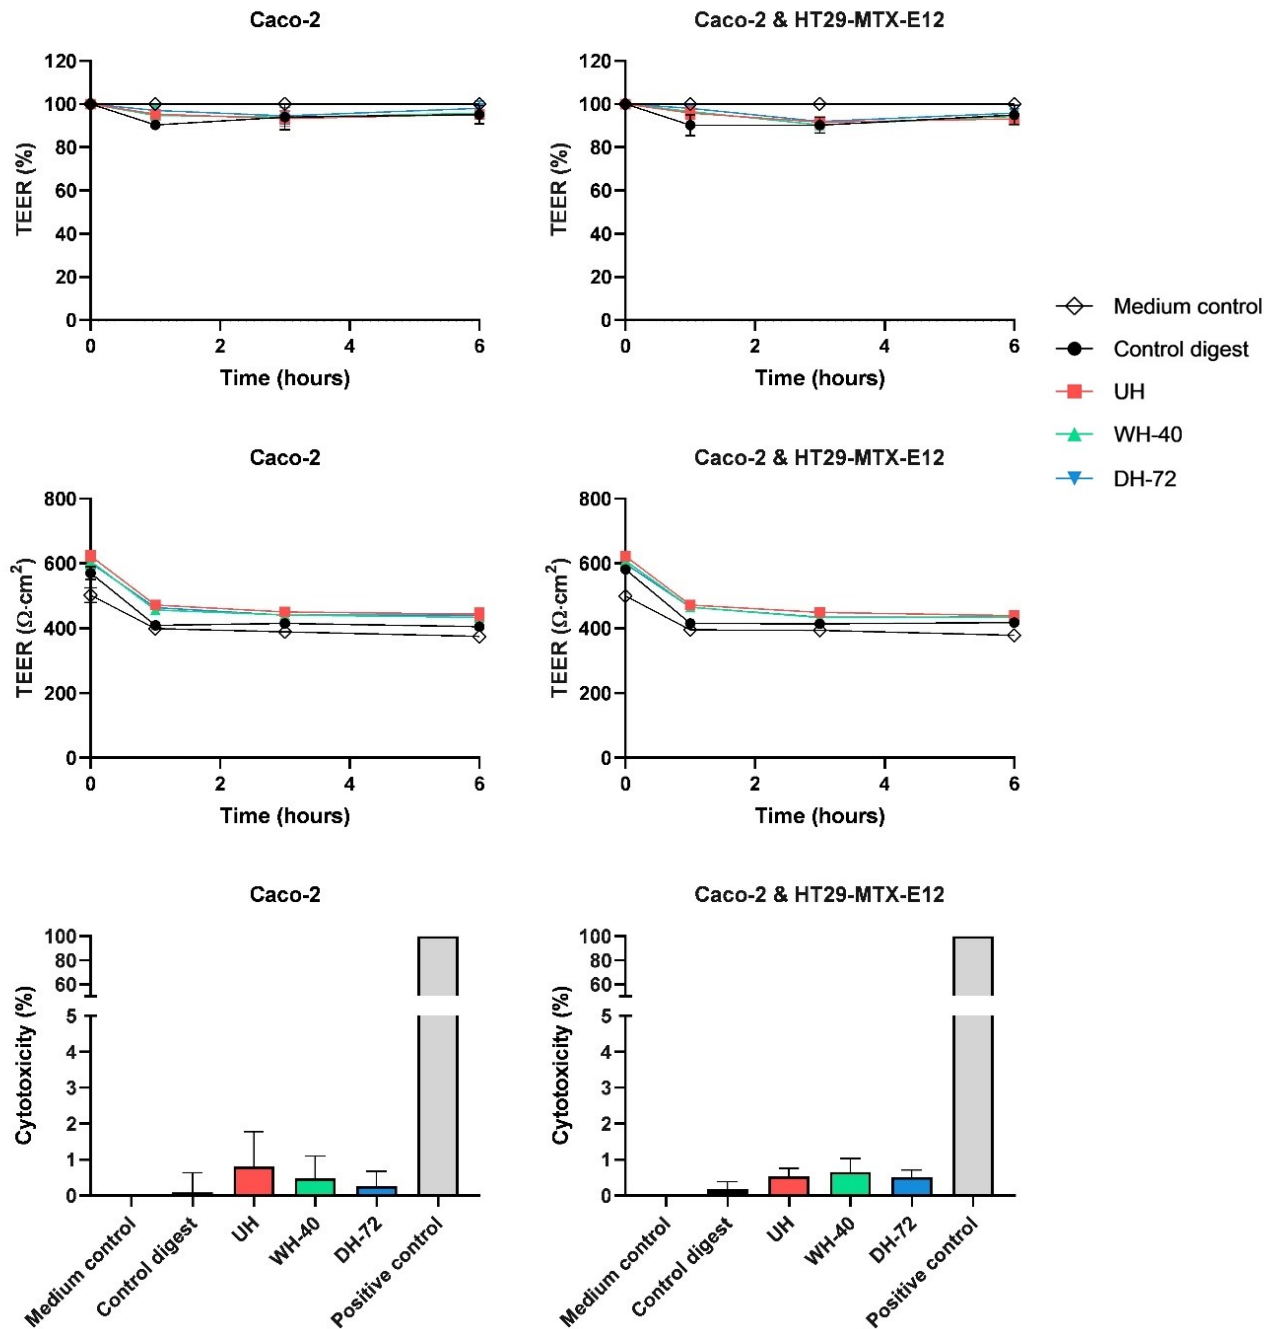

Figure S9: Relative and absolute transepithelial electrical resistance (TEER) values after 0-6h, and cytotoxicity effects 6h after filtered intestinal digests were applied to the apical side of the 21-days differentiated Caco-2 and Caco-2/HT29-MTX-E12 monolayers (n=3). An infant formula model system remained either unheated (UH), was wet heated for 40 min (WH-40) or dry heated for 72h (DH-72) and all samples were digested by use of an *in vitro* infant digestion model and filtered before the intestinal digests were applied to the Caco-2 and HT29-MTX-E12 cells for 0-6h (1:1 diluted in DMEM). Water instead of the infant formula model system was digested with the *in vitro* digestion model to obtain a control digest. Cytotoxicity was measured with the LDH assay. Medium control was Caco-2 and HT29-MTX-E12 cells exposed to DMEM, and was set to 0%. The LDH positive control Triton X100 releases the maximum amount of LDH present within the cell monolayers, and was set at 100%. Error bars represent standard deviation.

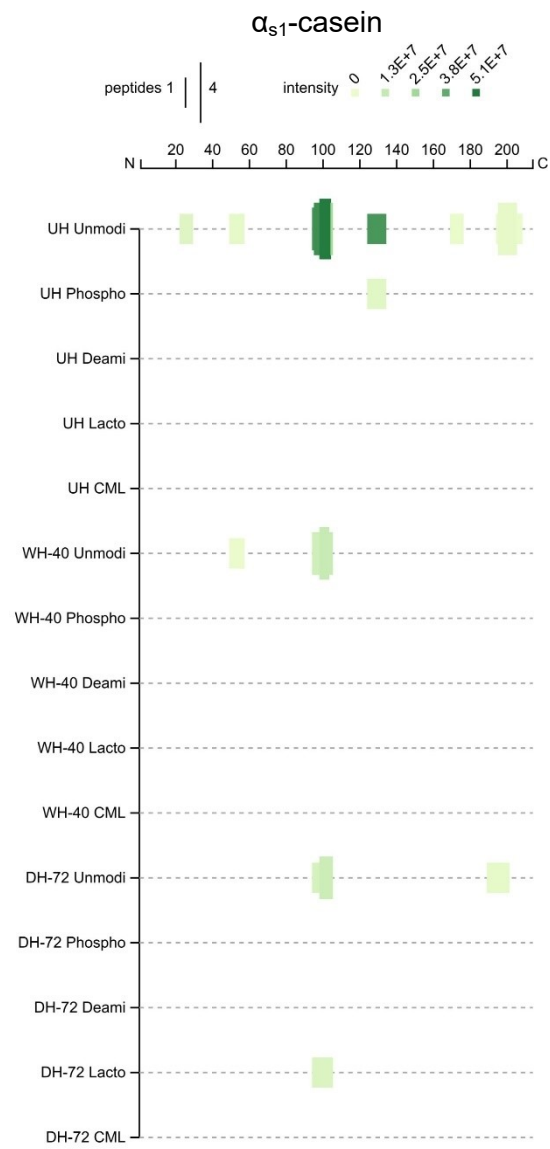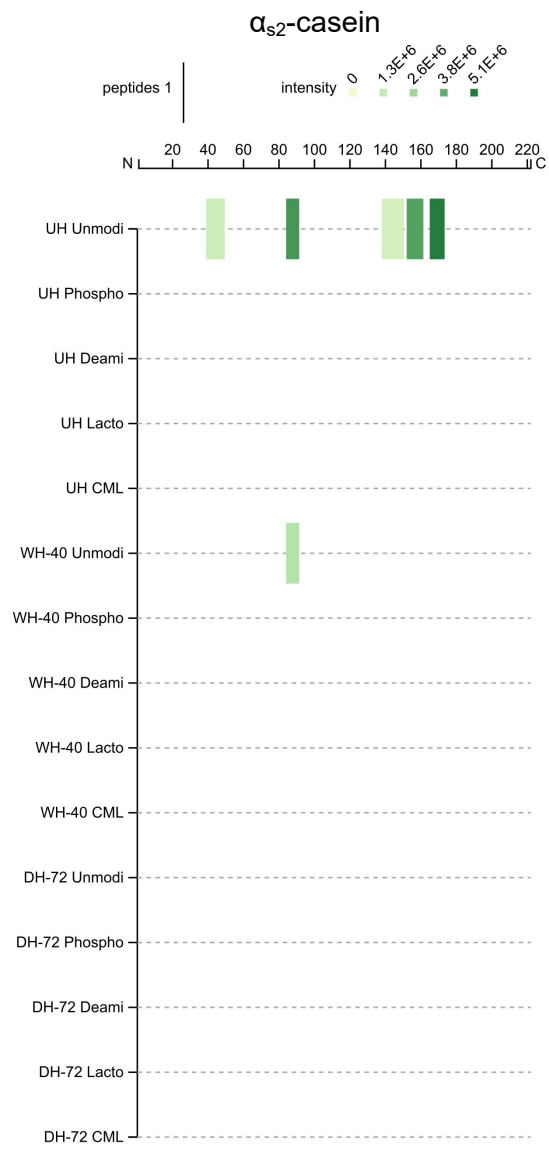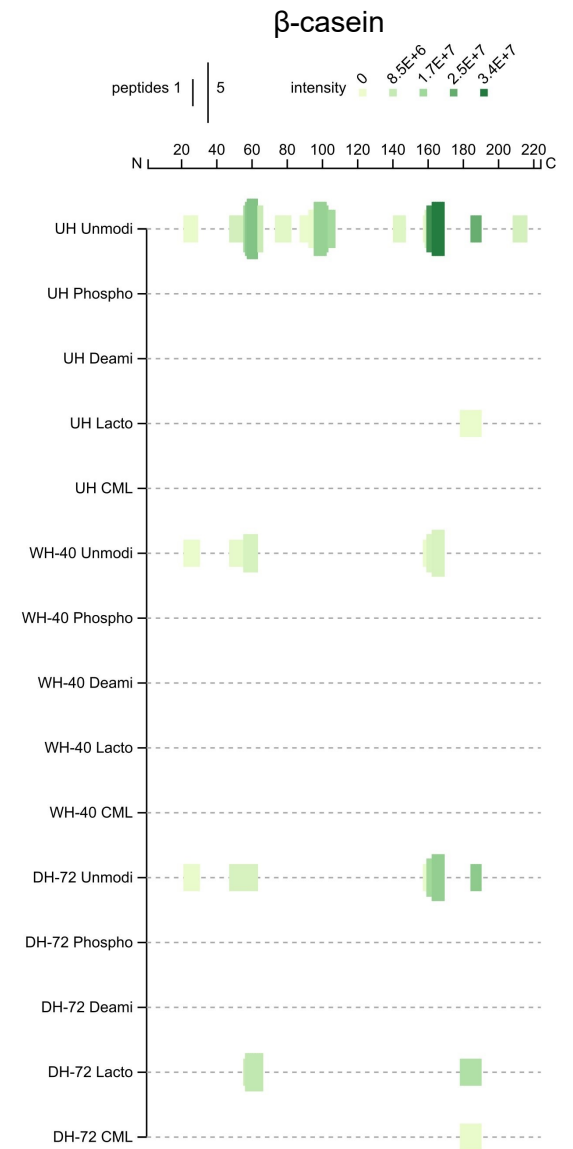

# κ-casein

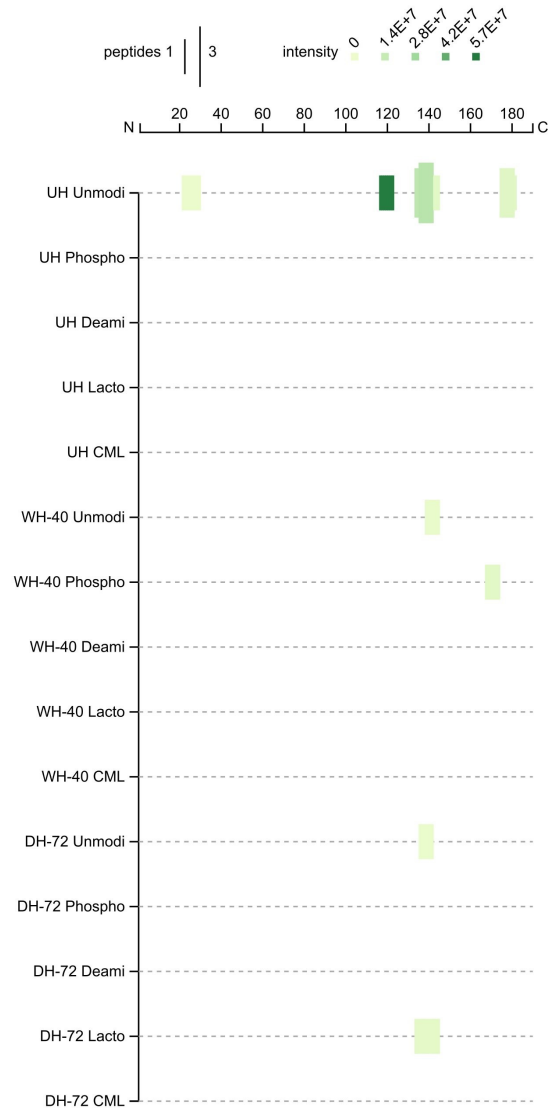

# β-Lg

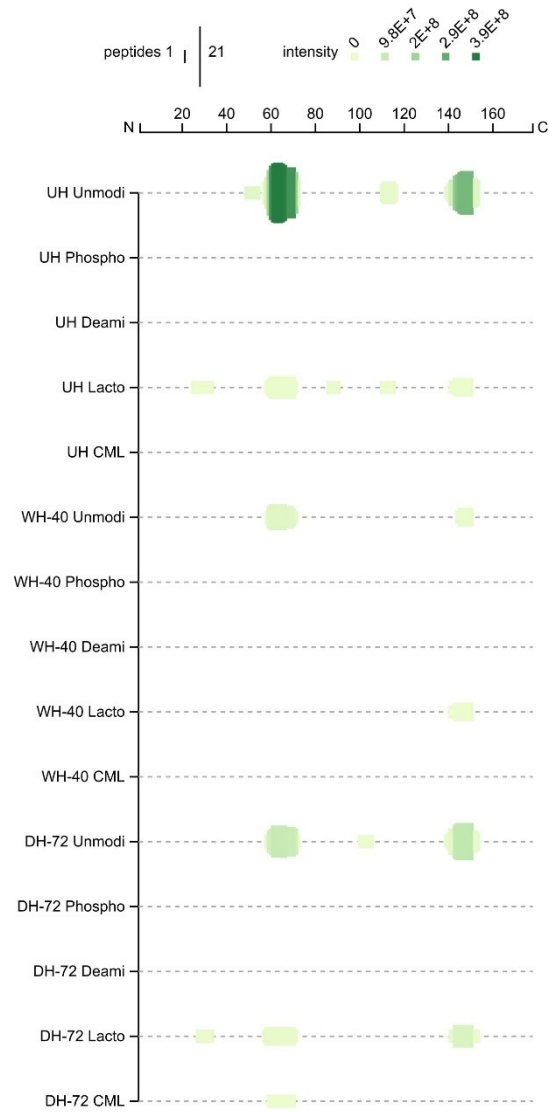

# α-La

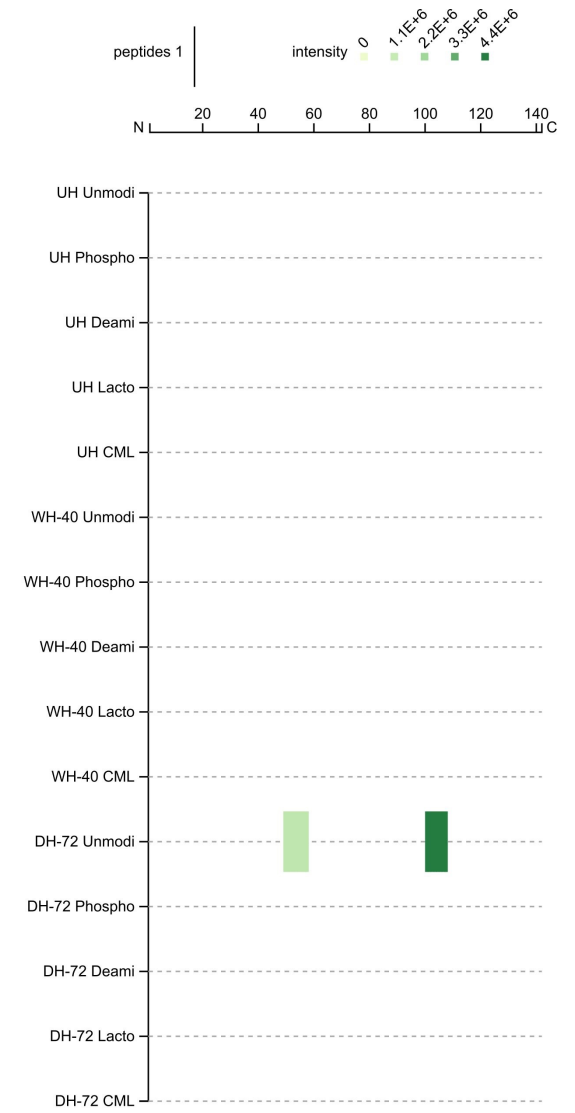

Figure S10: Peptide alignment for  $\alpha_{S1}$ -casein,  $\alpha_{S2}$ -casein,  $\beta$ -casein,  $\kappa$ -casein,  $\beta$ -lactoglobulin ( $\beta$ -Lg), and  $\alpha$ -lactalbumin ( $\alpha$ -La) detected with LC-MS/MS at the basolateral side after transport across a 21-days differentiated Caco-2 monolayer. An infant formula model system remained either unheated (UH), was wet heated for 40 min (WH-40) or dry heated for 72h (DH-72) and all samples were digested by use of an *in vitro* infant digestion model and filtered before the intestinal digests were applied to the Caco-2 cells for 6h. Peptide alignments are shown separately for unmodified (Unmodi), phosphorylated (Phospho), deamidation (Deami) modified, lactosylated (Lacto) and carboxymethyllysine (CML) modified peptides. The color of the bars represents the sum of peptide intensities that overlap at this position, and the height of the bars represents the number of peptides (peptide count) that overlap at this position. The amino acid position is given including the signal peptides of 15, 15, 15, 21, 16, and 19 amino acids for  $\alpha_{S1}$ -casein,  $\alpha_{S2}$ -casein,  $\beta$ -casein,  $\kappa$ -casein,  $\beta$ -Lg, and  $\alpha$ -La, respectively.



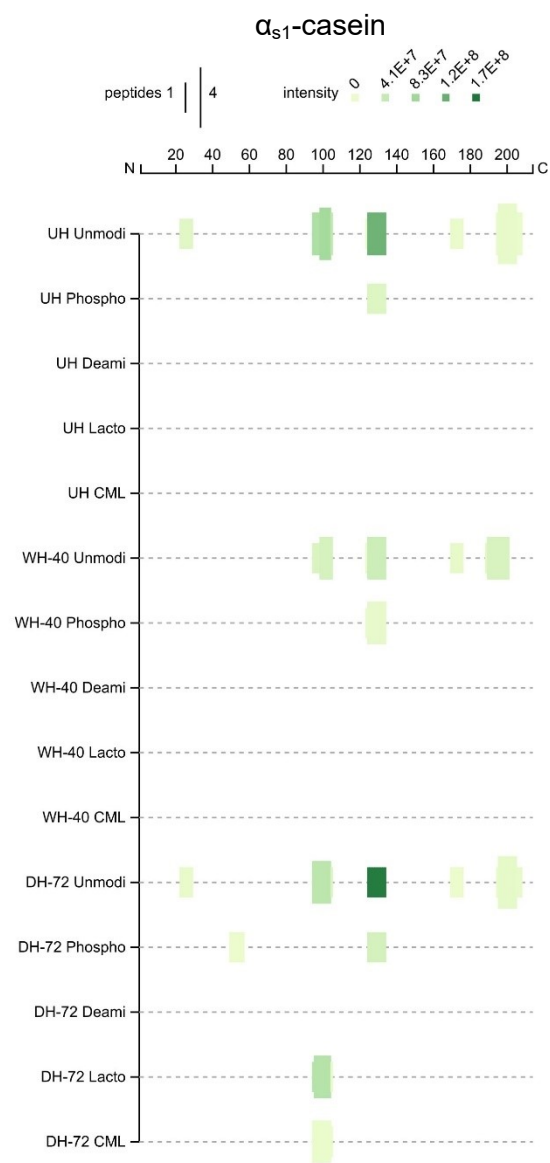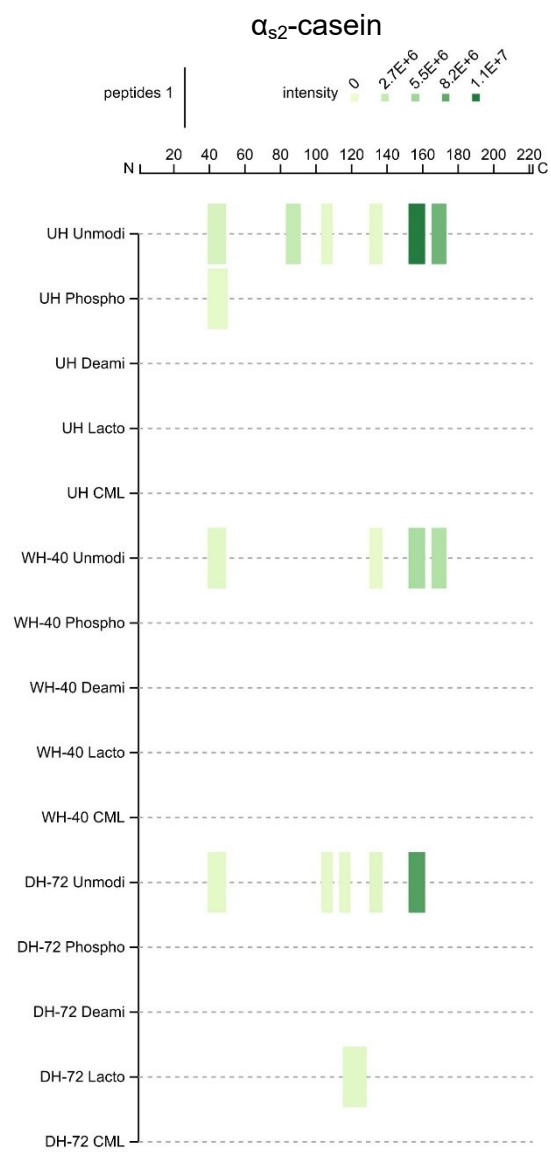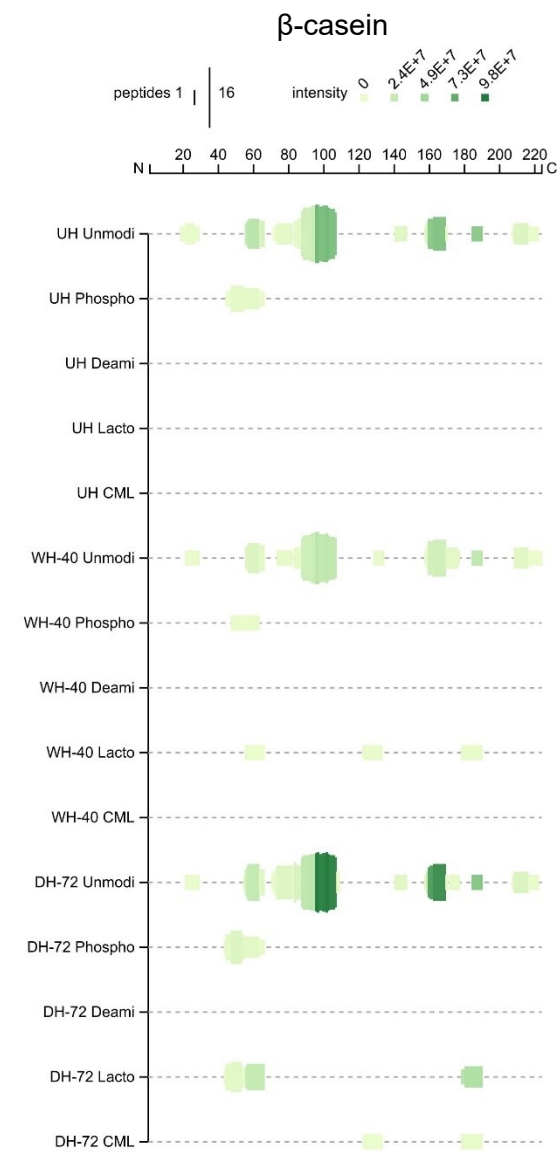

# κ-casein

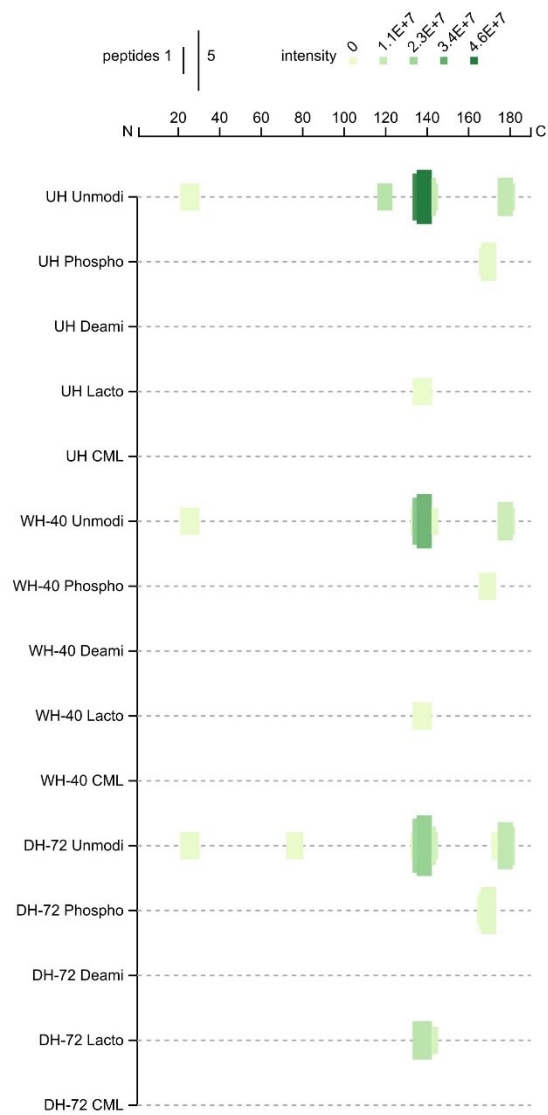

# β-Lg

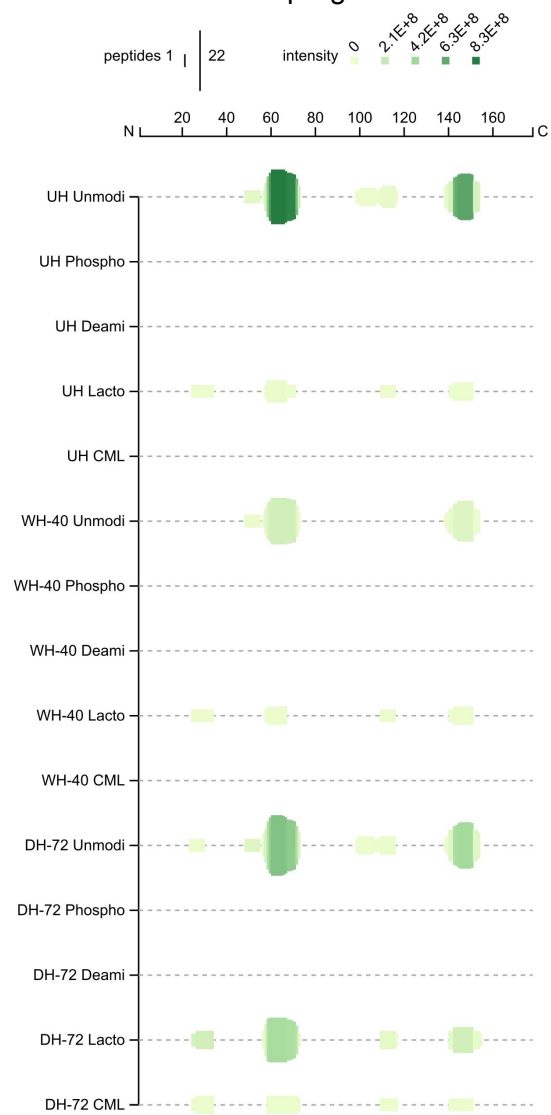

# α-La

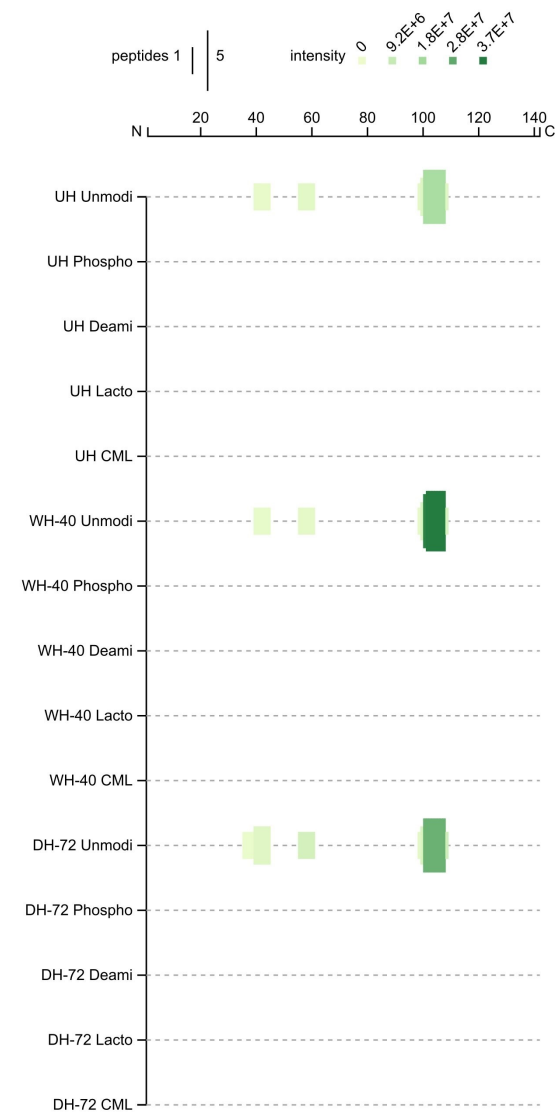

Figure S11: Peptide alignment for  $\alpha_{S1}$ -casein,  $\alpha_{S2}$ -casein,  $\beta$ -casein,  $\kappa$ -casein,  $\beta$ -lactoglobulin ( $\beta$ -Lg), and  $\alpha$ -lactalbumin ( $\alpha$ -La) detected with LC-MS/MS at the basolateral side after transport across a 21-days differentiated Caco-2/HT29-MTX-E12 (90/10) monolayer. An infant formula model system remained either unheated (UH), was wet heated for 40 min (WH-40) or dry heated for 72h (DH-72) and all samples were digested by use of an *in vitro* infant digestion model and filtered before the intestinal digests were applied to the Caco-2 and HT29-MTX-E12 cells for 6h. Peptide alignments are shown separately for unmodified (Unmodi), phosphorylated (Phospho), deamidation (Deami) modified, lactosylated (Lacto), and carboxymethyllysine (CML) modified peptides. The color of the bars represents the sum of peptide intensities that overlap at this position, and the height of the bars represents the number of peptides (peptide count) that overlap at this position. The amino acid position is given including the signal peptides of 15, 15, 15, 21, 16, and 19 amino acids for  $\alpha_{S1}$ -casein,  $\alpha_{S2}$ -casein,  $\beta$ -casein,  $\kappa$ -casein,  $\beta$ -Lg, and  $\alpha$ -La, respectively.

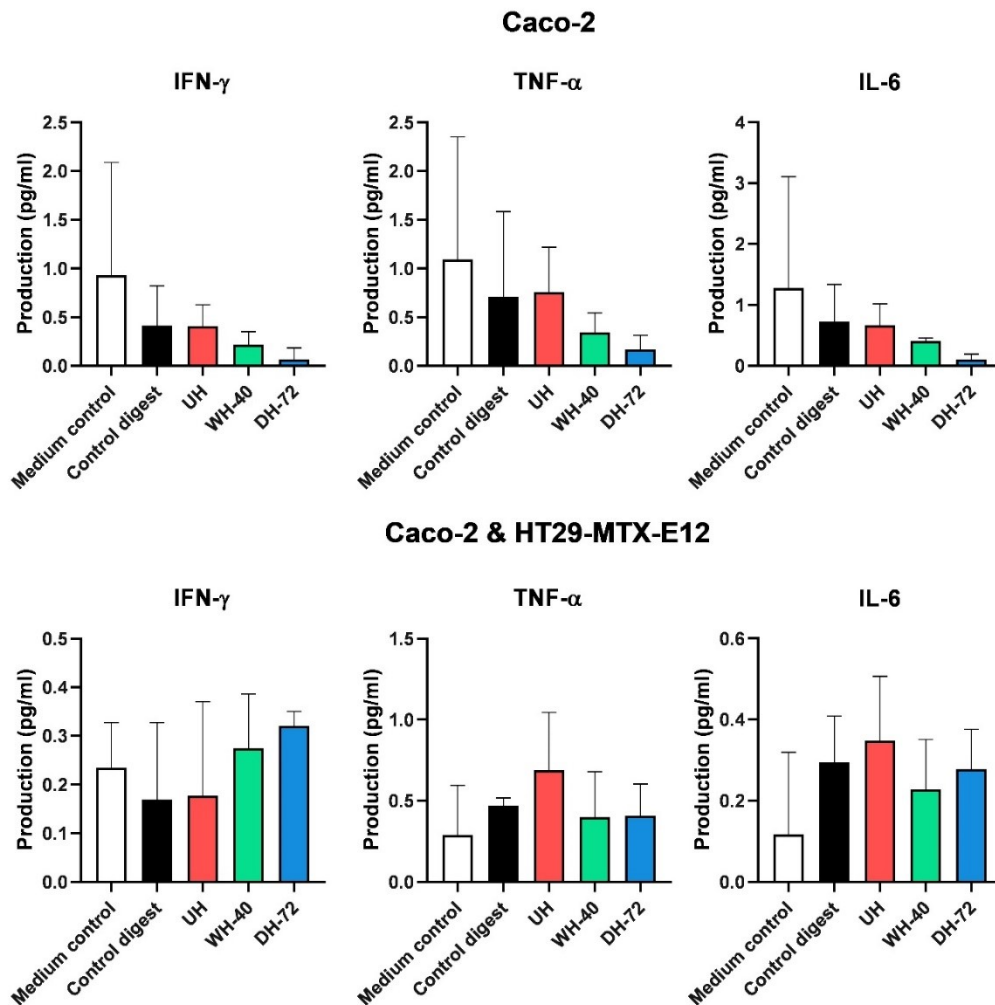

Figure S12: IFN- $\gamma$ , TNF- $\alpha$  and IL-6 concentrations measured with a LEGENDplex assay at the basolateral side of a 21-days differentiated Caco-2 monolayer or a Caco-2/HT29-MTX-E12 (90/10) monolayer after stimulation with the filtered intestinal digests for 6h (n=3). An infant formula model system remained either unheated (UH), was wet heated for 40 min (WH-40) or dry heated for 72h (DH-72) and all samples were digested by use of an *in vitro* infant digestion model and filtered before the intestinal digests were applied to the Caco-2 and Caco-2/HT29-MTX-E12 cells for 6h. Water instead of the infant formula model system was digested with the *in vitro* digestion model to obtain a control digest. Medium controls were Caco-2 and Caco-2/HT29-MTX-E12 cells exposed to DMEM. Detection limits of IFN- $\gamma$ , TNF- $\alpha$ , and IL-6 measured with the LEGENDplex assay were 0.25, 0.32, and 0.29 pg/ml, respectively. Cytokine concentrations were measured in triplicate, and the average of the three replicates is shown. If one of the replicates was below the detection limit, a value of zero was assigned to that replicate, and the mean was calculated accordingly. No statistical differences were found between the medium control, control digest, and milk digest samples. Error bars represent standard deviation.

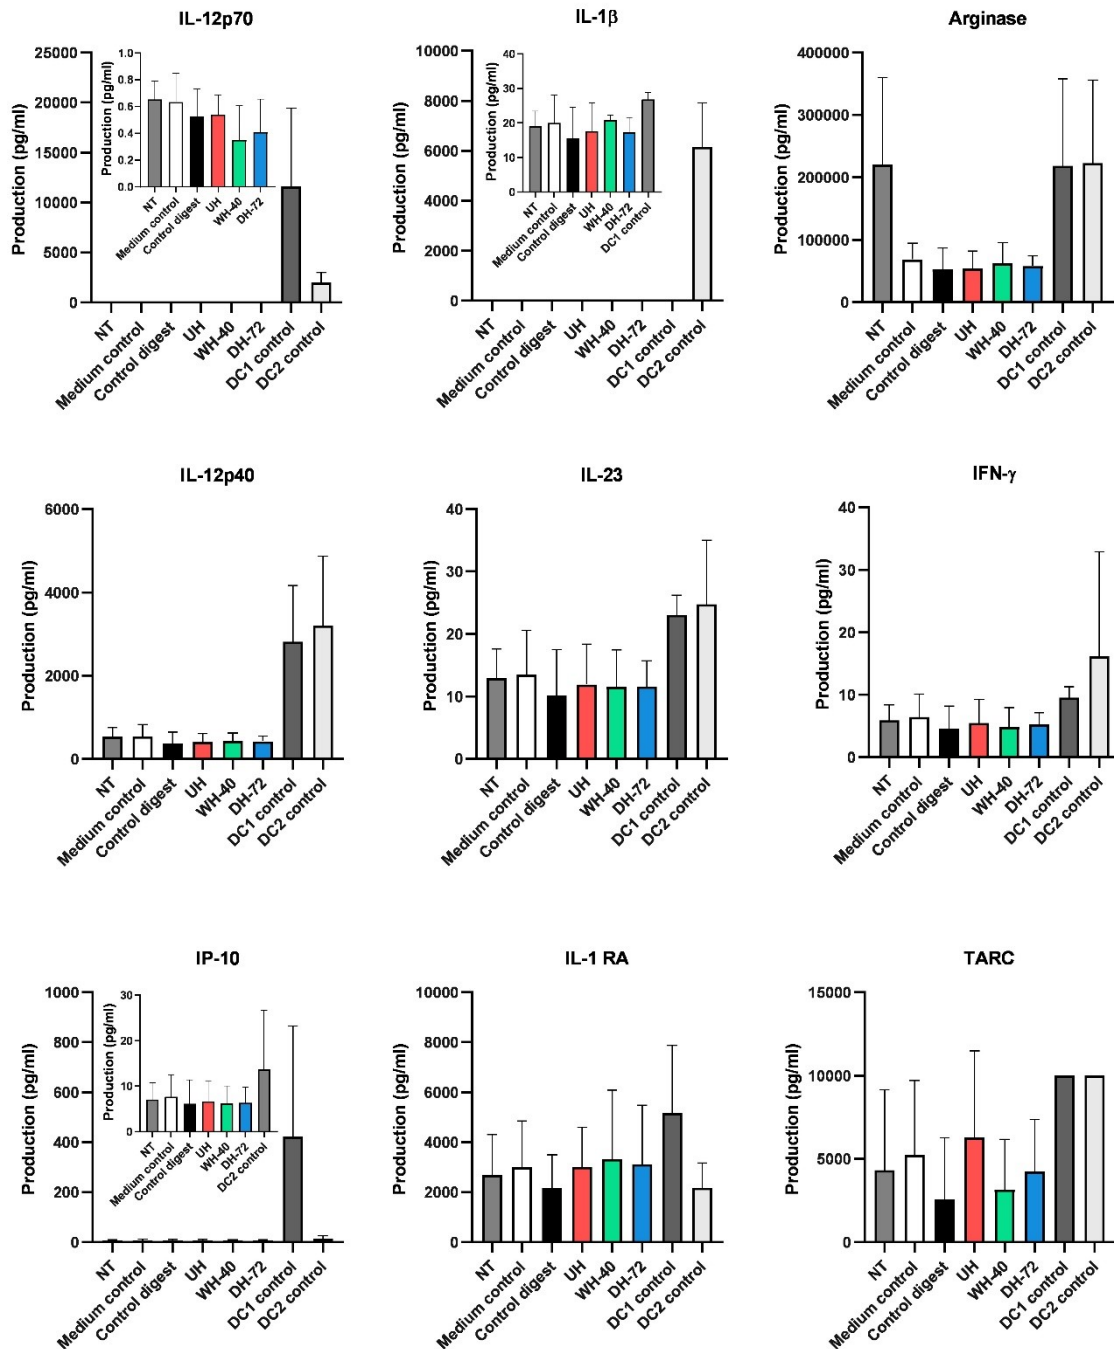

Figure S13: Cytokine concentrations after stimulating immature dendritic cells (iDCs) with medium from the basolateral side of a 21-days differentiated Caco-2 monolayer (n=5). An infant formula model system remained either unheated (UH), was wet heated for 40 min (WH-40) or dry heated for 72h (DH-72) and all samples were digested by use of an *in vitro* infant digestion model and filtered before the intestinal digests were applied to the Caco-2 cells for 6h. Water instead of the infant formula model system was digested with the *in vitro* digestion model to obtain a control digest. Medium controls were Caco-2 cells exposed to DMEM. Non-treated (NT) iDCs, DC1 controls and DC2 controls were grown and stimulated in IMDM. The detection ranges of the cytokines measured with the LEGENDplex assay were: IL-12p70: 0.43 – 9000 pg/ml, IL-1β: 1.90 – 9000 pg/ml, arginase: 0.61 – 320000 pg/ml, IL-12p40: 13.3 – 45000 pg/ml, IL-23: 0.58 – 10000 pg/ml, IFN-γ: 0.98 – 9000 pg/ml, IP-10: 0.99 – 10000 pg/ml, IL-1RA: 64.6 – 400000 pg/ml, and TARC:

0.77 – 10000 pg/ml. Cytokine concentrations were measured in five replicates, and the average of the replicates is shown. If one of the replicates was below the detection limit, a value of zero was assigned to that replicate, and the mean was calculated accordingly. No statistical differences were found between NT, medium control, control digest, and milk digest samples. Error bars represent standard deviation.

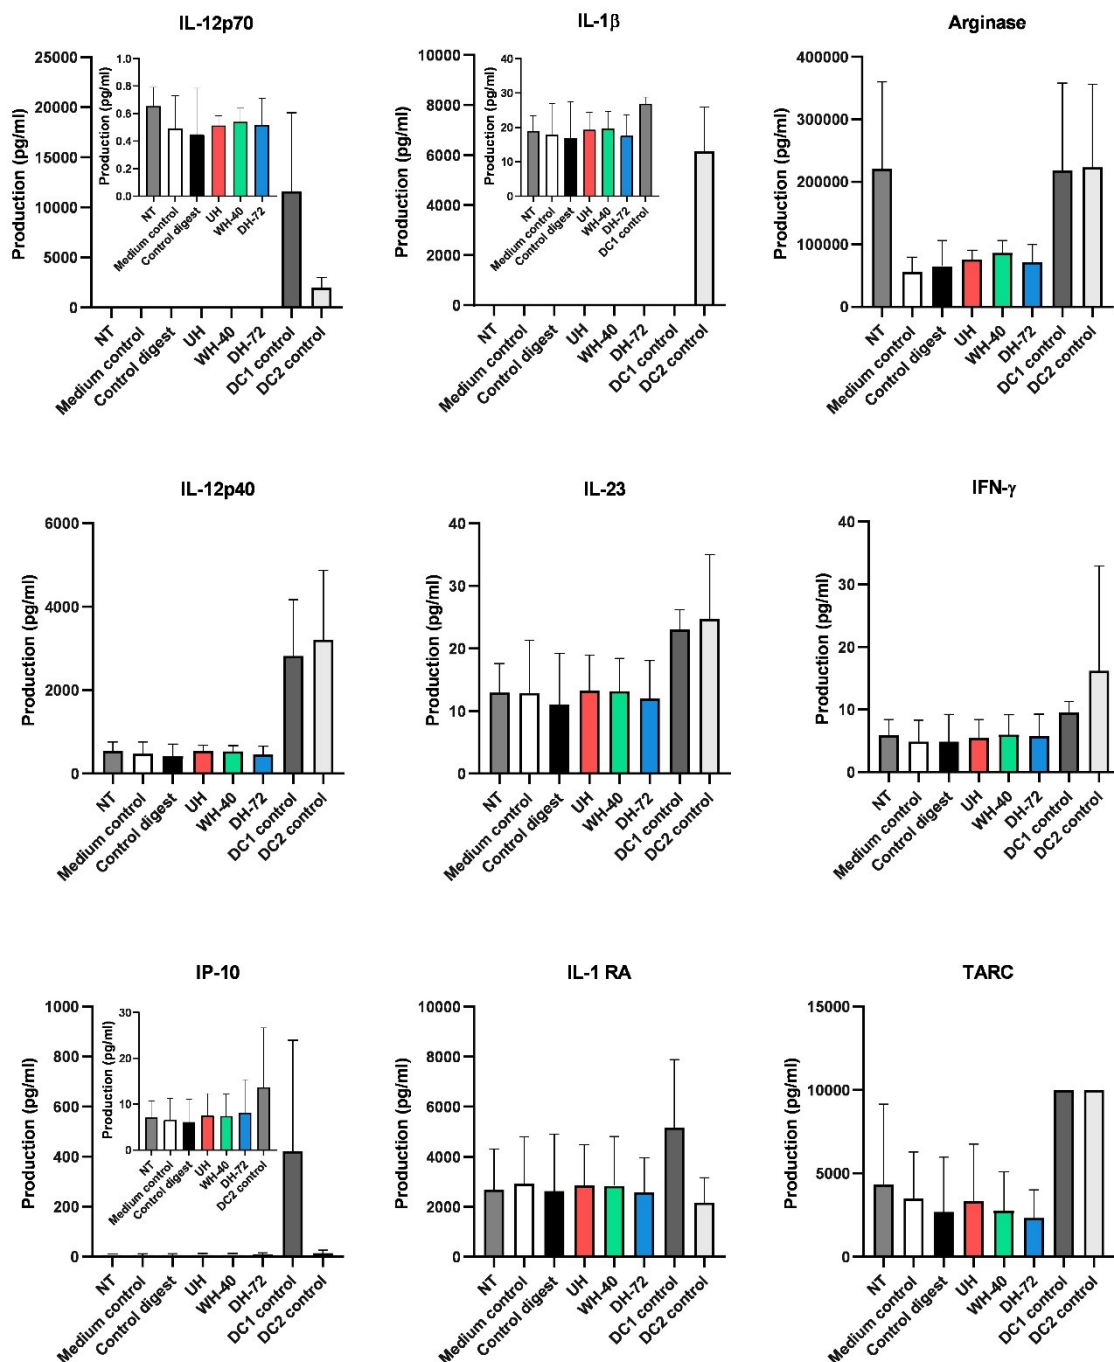

Figure S14: Cytokine concentrations after stimulating immature dendritic cells (iDCs) with medium from the basolateral side of a 21-days differentiated Caco-2/HT29-MTX-E12 (90/10) monolayer (n=5). An infant formula model system remained either unheated (UH), was wet heated for 40 min (WH-40) or dry heated for 72h (DH-72) and all samples were digested by use of an *in vitro* infant digestion model and filtered before the intestinal digests were applied to the Caco-2/HT29-MTX-

E12 cells for 6h. Water instead of the infant formula model system was digested with the *in vitro* digestion model to obtain a control digest. Medium controls were Caco-2/HT29-MTX-E12 cells exposed to DMEM. Non-treated (NT) iDCs, DC1 controls and DC2 controls were grown and stimulated in IMDM. The detection ranges of the cytokines measured with the LEGENDplex assay were: IL-12p70: 0.43 – 9000 pg/ml, IL-1 $\beta$ : 1.90 – 9000 pg/ml, arginase: 0.61 – 320000 pg/ml, IL-12p40: 13.3 – 45000 pg/ml, IL-23: 0.58 – 10000 pg/ml, IFN- $\gamma$ : 0.98 – 9000 pg/ml, IP-10: 0.99 – 10000 pg/ml, IL-1RA: 64.6 – 400000 pg/ml, and TARC: 0.77 – 10000 pg/ml. Cytokine concentrations were measured in five replicates, and the average of the replicates is shown. If one of the replicates was below the detection limit, a value of zero was assigned to that replicate, and the mean was calculated accordingly. No statistical differences were found between NT, medium control, control digest, and milk digest samples. Error bars represent standard deviation.

Table S1: qPCR forward and reverse primers details used in mucins gene expression analysis. MUC: mucin; CF3A1: Splicing factor 3 subunit 1; HPRT1: Hypoxanthine Phosphoribosyl Transferase 1; hCyclo: human Cyclophilin A (PPIA); RPS18: Ribosomal protein S18; GAPDH: Glyceraldehyde-3-phosphate dehydrogenase. For MUC2, MUC6, MUC12 and MUC15 the primer efficiency could not be determined (ND), as the genes were barely expressed in our models.

| Gene   | Forward primer 5'-3'    | Reverse primer 5'-3'     | [Primer]    | Efficiency | Reference                 |
|--------|-------------------------|--------------------------|-------------|------------|---------------------------|
| MUC1   | TGCCGCCGAAAGAACTACG     | TGGGGTACTCGCTCATAGGAT    | 3.2 $\mu$ M | 102.7%     | PrimerBank ID 324120973c1 |
| MUC2   | AGGATGACACCATCTACCTCAC  | CATCGCTCTTCTCAATGAGCA    | 3.2 $\mu$ M | ND         | PrimerBank ID 116284391c2 |
| MUC3A  | CCGGACCTCAATGACAACACT   | ACCACGATGCTGCCATTCT      | 3.2 $\mu$ M | 99.4%      | Pan et al.,2013           |
| MUC3B  | TGACGCTCAGCAAAACCGATAAC | AACAGGCTTCAGGACCAAGACAGC | 3.2 $\mu$ M | 104.2%     | George et al.,2018        |
| MUC5A  | CAGCACAACCCCTGTTTCAAA   | GCGCACAGAGGATGACAGT      | 3.2 $\mu$ M | 94.1%      | PrimerBank ID 3334747a1   |
| MUC6   | TGGTGAACCTCGTGGAAGGA    | TGGCAGGTGGCAAAGGT        | 3.2 $\mu$ M | ND         | Shi & Xi, 2021            |
| MUC12  | CCAGTTCAAGCGACCCCTTTTA  | CGCTGTGGGATACTGTTGATT    | 3.2 $\mu$ M | ND         | PrimerBank ID 256600256c2 |
| MUC13  | GATCCCTGTGCAGATAATTCGTT | ACTATGCAAGTCTTGATAGGCCA  | 3.2 $\mu$ M | 101.0%     | PrimerBank ID 308736984c2 |
| MUC15  | TATTCATTCTATCGGGGAGCC   | GGGAATGACTCGCCTTGAGAT    | 3.2 $\mu$ M | ND         | PrimerBank ID 205360922c1 |
| MUC17  | TCTCAGCACGTTAGGACAGGT   | TCGAGGTCATCTCAGGGTTGG    | 3.2 $\mu$ M | 82.6%      | PrimerBank ID 91982771c1  |
| SF3A1  | GGAGGATTCTGCACCTTCTAA   | GCGGTAGTAGGCATGGTAA      | 3.2 $\mu$ M | 96.6%      | Szabo et al., 2004        |
| HPRT1  | CCTGGCGTCGTGATTAGTGAT   | AGACGTTCAATCCTGTCCATAA   | 3.2 $\mu$ M | 97.5%      | Primerbank 164518913c1    |
| RPS18  | ATCACCATTATGCAGAATCCACG | GACCTGGCTGTATTTCCATCC    | 3.2 $\mu$ M | 92.0%      | PrimerBank ID 14165467c2  |
| hCyclo | CCCACCGTGTCTTCGACAT     | TCTTTGGGACCTTGTCTGCAA    | 1.6 $\mu$ M | 89.2%      | Own design                |
| GAPDH  | TGCACCACCAACTGCTTAGC    | GGCATGGACTGTGGTCATGAG    | 1.6 $\mu$ M | 89.0%      | Vandesompele et al., 2002 |



Table S2: HLA-II epitopes predicted in the filtered intestinal digests by use of the IEDB MHC Class II Binding Prediction tool. An infant formula model system remained either unheated (UH), was wet heated for 40 min (WH-40) or dry heated for 72h (DH-72) and all samples were digested by use of an *in vitro* infant digestion model. Amino acid (AA) position provides the position of the peptide containing an HLA epitope in the protein without the signal peptide. Modification indicates if the peptide was detected in the digest in unmodified, phosphorylated, deamidation modified, lactosylated, or carboxymethyllysine (CML) modified form.

| Protein of origin     | Peptide           | AA position | HLA gene               | Intensity UH | Intensity WH-40 | Intensity DH-72 | Modification                               |
|-----------------------|-------------------|-------------|------------------------|--------------|-----------------|-----------------|--------------------------------------------|
| $\alpha_{s1}$ -casein | FFVAPFPEVFG       | 23-33       | HLA-DP, HLA-DQ, HLA-DR | 9.14E+06     | 6.57E+08        | 1.08E+07        | Unmodified                                 |
|                       | KYKVPQLEIVPNSAEER | 103-119     | HLA-DR                 |              | 1.13E+08        |                 | Phosphorylation                            |
|                       | YKVPQLEIVPNSAEE   | 104-118     | HLA-DR                 | 1.24E+07     | 1.96E+08        |                 | Phosphorylation                            |
|                       | YKVPQLEIVPNSAEER  | 104-119     | HLA-DR                 | 1.02E+08     | 1.35E+09        | 2.78E+07        | Phosphorylation                            |
|                       | KVPQLEIVPNSAEE    | 105-118     | HLA-DR                 |              | 2.91E+08        |                 | Phosphorylation                            |
|                       | KVPQLEIVPNSAEER   | 105-119     | HLA-DR                 | 3.48E+08     | 2.78E+09        | 7.26E+07        | Phosphorylation, Deamidation               |
|                       | VPQLEIVPNSAEER    | 106-119     | HLA-DR                 | 2.97E+08     | 1.55E+09        | 2.11E+08        | Phosphorylation, Deamidation               |
|                       | PQLEIVPNSAEER     | 107-119     | HLA-DR                 |              | 1.81E+06        |                 | Phosphorylation                            |
|                       | QLEIVPNSAEER      | 108-119     | HLA-DR                 | 1.59E+07     | 1.44E+07        | 1.24E+07        | Phosphorylation                            |
|                       | LEIVPNSAEER       | 109-119     | HLA-DR                 | 1.29E+09     | 4.50E+09        | 7.07E+08        | Phosphorylation, Deamidation               |
|                       | EGIHAQQKEPM       | 125-135     | HLA-DR                 | 2.67E+07     | 2.48E+07        | 5.37E+07        | Unmodified, Deamidation                    |
|                       | EGIHAQQKEPMIGV    | 125-138     | HLA-DR                 |              | 7.44E+06        | 7.51E+06        | Unmodified                                 |
|                       | EPMIGVNQELA       | 133-143     | HLA-DQ                 | 4.10E+07     | 1.10E+08        | 8.49E+07        | Unmodified                                 |
| $\alpha_{s2}$ -casein | TDAPSFSDIPNPIGSEN | 174-190     | HLA-DR                 | 1.52E+07     | 4.29E+07        | 4.11E+07        | Unmodified                                 |
|                       | NMAINPSKENL       | 25-35       | HLA-DR                 | 6.37E+08     | 2.68E+08        | 3.67E+08        | Unmodified, Phosphorylation, Lactosylation |
|                       | KITVDDKHYQK       | 70-80       | HLA-DR                 |              | 3.53E+07        |                 | Unmodified                                 |
|                       | YQGPIVLNPWDQV     | 100-112     | HLA-DR                 | 4.30E+07     | 1.10E+07        | 2.60E+08        | Unmodified                                 |
|                       | YQGPIVLNPWDQVK    | 100-113     | HLA-DR                 | 5.29E+06     |                 | 7.59E+08        | Lactosylation                              |
|                       | QGPIVLNPWDQV      | 101-112     | HLA-DR, HLA-DP         | 6.50E+07     | 1.09E+08        | 1.31E+08        | Unmodified                                 |
|                       | QGPIVLNPWDQVK     | 101-113     | HLA-DR, HLA-DP         | 2.93E+06     |                 | 2.31E+08        | Lactosylation                              |
|                       | TKLTEEEKNRL       | 151-161     | HLA-DR                 |              | 1.21E+07        |                 | Unmodified                                 |
|                       | TKLTEEEKNRLN      | 151-162     | HLA-DR                 | 3.32E+07     | 2.56E+07        |                 | Unmodified                                 |
| $\beta$ -casein       | EELNVPGEIVES      | 4-15        | HLA-DQ                 | 6.18E+07     | 3.06E+07        | 2.11E+07        | Unmodified                                 |
|                       | EELNVPGEIVESL     | 4-16        | HLA-DQ                 | 2.21E+07     | 2.46E+07        | 8.93E+06        | Phosphorylation                            |
|                       | LNVPGEIVESL       | 6-16        | HLA-DQ                 | 5.54E+06     | 5.87E+06        | 5.69E+06        | Phosphorylation                            |

|                                          |                |           |                           |           |           |           |                                |
|------------------------------------------|----------------|-----------|---------------------------|-----------|-----------|-----------|--------------------------------|
|                                          | KIEKFQSEEQQ    | 29-39     | HLA-DR, HLA-DQ            |           |           | 1.21E+07  | Phosphorylation, CML           |
|                                          | TPVVVPFLQP     | 80-90     | HLA-DP                    | 5.35E+07  | 2.01E+07  | 9.39E+06  | Unmodified                     |
|                                          | TPVVVPFLQPEV   | 80-92     | HLA-DP                    | 1.14E+08  | 1.04E+08  | 6.29E+07  | Unmodified                     |
|                                          | PVVVPFLQPE     | 81-91     | HLA-DP                    | 2.82E+08  | 9.53E+07  | 1.48E+08  | Unmodified                     |
|                                          | SLSQSKVLPVPQ   | 164-175   | HLA-DR, HLA-DQ            | 3.20E+06  | 2.30E+08  | 6.89E+09  | Lactosylation, CML             |
|                                          | LSQSKVLPVPQ    | 165-175   | HLA-DQ                    |           |           | 9.71E+07  | Lactosylation                  |
| κ-casein                                 | ALINNQFLPYP    | 49-59     | HLA-DP, HLA-DR,<br>HLA-DQ | 2.55E+05  | 1.32E+07  |           | Unmodified                     |
|                                          | TIASGEPTSTPT   | 124-135   | HLA-DQ                    | 2.16E+07  | 1.34E+07  | 1.69E+07  | Unmodified, Phosphorylation    |
|                                          | IASGEPTSTPT    | 125-135   | HLA-DQ                    | 1.48E+07  | 8.21E+06  |           | Unmodified                     |
|                                          | IASGEPTSTPTTE  | 125-137   | HLA-DQ                    | 5.18E+07  | 1.21E+07  | 4.64E+07  | Unmodified                     |
|                                          | IASGEPTSTPTTEA | 125-138   | HLA-DQ                    | 4.12E+07  | 1.23E+07  | 3.74E+07  | Unmodified                     |
| β-Lg                                     | IIAEKTkipAVF   | 71-82     | HLA-DR                    | 9.09E+06  |           |           | Unmodified                     |
|                                          | KIDALNENKVL    | 83-93     | HLA-DR                    | 4.85E+08  | 1.58E+07  | 1.03E+08  | Unmodified, CML                |
|                                          | KIDALNENKVLV   | 83-94     | HLA-DR                    | 8.74E+07  |           | 3.48E+07  | Unmodified, CML                |
|                                          | VLVLDTDYKKY    | 92-102    | HLA-DR                    | 4.73E+07  | 3.80E+06  |           | Unmodified                     |
|                                          | TPEVDDEALEKF   | 125-136   | HLA-DQ                    | 1.95E+09  | 1.11E+08  | 1.39E+09  | Unmodified, Lactosylation, CML |
|                                          | LSFNPTQLEEQ    | 149-159   | HLA-DQ                    | 4.47E+07  |           | 7.06E+07  | Unmodified                     |
|                                          | GYGGVSLPEWV    | 17-27     | HLA-DQ                    | 5.18E+07  | 6.86E+07  | 7.95E+07  | Unmodified                     |
| α-La                                     | IVQNNDSTEYG    | 41-51     | HLA-DR                    | 3.21E+07  | 1.58E+08  | 2.55E+08  | Unmodified, Deamidation        |
| Osteopontin                              | DKNKHSNLIESQ   | 207-218   | HLA-DQ                    | 8.50E+06  | 6.65E+06  |           | Phosphorylation                |
| Desmoplakin                              | LQKYQAECsqFK   | 1072-1083 | HLA-DR                    | 3.34E+08  | 1.30E+07  | 5.26E+07  | Phosphorylation, CML           |
| GRIP and coiled-coil domain containing 2 | IDQLKLKLQDTQNS | 1358-1371 | HLA-DR                    | 5.98E+08  | 6.92E+07  | 4.32E+08  | Deamidation, CML               |
| Inositol 1,4,5-trisphosphate receptor    | IQKSFYNLMTS    | 1761-1771 | HLA-DP, HLA-DQ,<br>HLA-DR | 1.71E+08  | 2.91E+07  | 4.26E+07  | Phosphorylation                |
| Nucleobindin-1                           | ILHDINSDGVLDEQ | 247-260   | HLA-DQ, HLA-DR            |           | 1.38E+07  | 1.99E+07  | Unmodified                     |
| Polymeric immunoglobulin receptor        | KVVQGEPSLKVPK  | 455-467   | HLA-DP, HLA-DR            | 3.25E+07  |           |           | Unmodified                     |
| TSPO associated protein 1                | WQSWTPGRGGDA   | 24-35     | HLA-DQ                    | 6.66E+07  | 1.61E+07  |           | Deamidation, Phosphorylation   |
| <b>Count</b>                             |                |           |                           | <b>42</b> | <b>43</b> | <b>37</b> |                                |

|                        |                 |                 |                 |
|------------------------|-----------------|-----------------|-----------------|
| <b>Total Intensity</b> | <b>7.54E+09</b> | <b>1.32E+10</b> | <b>1.28E+10</b> |
|------------------------|-----------------|-----------------|-----------------|

Table S3: Linear IgE epitopes predicted in the filtered intestinal digests. An infant formula model system remained either unheated (UH), was wet heated for 40 min (WH-40) or dry heated for 72h (DH-72) and all samples were digested by use of an *in vitro* infant digestion model. Amino acid (AA) position provides the position of the peptide containing a linear IgE epitope in the protein without the signal peptide. Modification indicates if the peptide was detected in the digest in unmodified, phosphorylated, deamidation modified, lactosylated, or carboxymethyllysine (CML) modified form.

| Protein of origin     | Peptide                | AA position | IgE epitope position | Intensity UH | Intensity WH-40 | Intensity DH-72 | Modification                 |
|-----------------------|------------------------|-------------|----------------------|--------------|-----------------|-----------------|------------------------------|
| $\alpha_{s1}$ -casein | HQGLPQEVLENL           | 8-20        | 6-20                 |              | 6.39E+06        |                 | Unmodified                   |
|                       | KYKVPQLEIVPNSAEER      | 103-119     | 109-120              |              | 1.13E+08        |                 | Phosphorylation              |
|                       | YKVPQLEIVPNSAEE        | 104-118     | 109-120              | 1.24E+07     | 1.96E+08        |                 | Phosphorylation              |
|                       | YKVPQLEIVPNSAEER       | 104-119     | 109-120              | 1.02E+08     | 1.35E+09        | 2.78E+07        | Phosphorylation              |
|                       | KVPQLEIVPNSAEE         | 105-118     | 109-120              |              | 2.91E+08        |                 | Phosphorylation              |
|                       | KVPQLEIVPNSAEER        | 105-119     | 109-120              | 3.48E+08     | 2.78E+09        | 7.26E+07        | Phosphorylation, Deamidation |
|                       | VPQLEIVPNSAEER         | 106-119     | 109-120              | 2.97E+08     | 1.55E+09        | 2.11E+08        | Phosphorylation, Deamidation |
|                       | PQLEIVPNSAEER          | 107-119     | 109-120              |              | 1.81E+06        |                 | Phosphorylation              |
|                       | QLEIVPNSAEER           | 108-119     | 109-120              | 1.59E+07     | 1.44E+07        | 1.24E+07        | Phosphorylation              |
|                       | LEIVPNSAEE             | 109-118     | 109-120              | 1.05E+08     | 5.87E+08        | 5.71E+07        | Phosphorylation              |
|                       | LEIVPNSAEER            | 109-119     | 109-120              | 1.29E+09     | 4.50E+09        | 7.07E+08        | Phosphorylation, Deamidation |
|                       | EIVPNSAEER             | 110-119     | 109-120              | 7.23E+09     | 1.65E+09        | 6.66E+09        | Phosphorylation, Deamidation |
|                       | LHSMKEGIHAQ            | 120-130     | 122-132              |              | 5.89E+07        |                 | Unmodified                   |
|                       | SMKEGIHAQ              | 122-130     | 122-132              |              | 1.26E+07        |                 | Unmodified                   |
|                       | EGIHAQQKEPMIGV         | 125-138     | 126-140              |              | 7.44E+06        | 7.51E+06        | Unmodified                   |
|                       | EGIHAQQKEPMIGVNQEL     | 125-142     | 126-140              |              | 1.09E+07        |                 | Unmodified                   |
|                       | EGIHAQQKEPMIGVNQELA    | 125-143     | 126-140              |              | 9.74E+07        |                 | Unmodified                   |
|                       | AQQKEPMIGVNQEL         | 129-142     | 126-140              | 7.58E+06     | 5.82E+06        | 1.16E+07        | Unmodified                   |
|                       | AQQKEPMIGVNQELA        | 129-143     | 126-140              | 1.34E+07     | 1.86E+07        | 1.59E+07        | Unmodified                   |
|                       | QYTDAPSFSDIPNPI        | 172-186     | 171-185              |              | 1.07E+09        |                 | Unmodified                   |
|                       | QYTDAPSFSDIPNPIGSENSEK | 172-193     | 171-185; 173-194     |              | 1.59E+07        | 7.01E+06        | Unmodified                   |
|                       | YTDAPSFSDIPNPI         | 173-186     | 171-185              | 2.95E+08     | 4.47E+07        | 2.99E+08        | Unmodified                   |
|                       | TDAPSFSDIPNPI          | 174-186     | 171-185              | 2.95E+09     | 7.23E+06        | 1.27E+07        | Unmodified, Phosphorylation  |
|                       | TDAPSFSDIPNPIGSEN      | 174-190     | 171-185              | 1.52E+07     | 4.29E+07        | 4.11E+07        | Unmodified                   |

|                       |                           |         |                  |          |          |          |                                |
|-----------------------|---------------------------|---------|------------------|----------|----------|----------|--------------------------------|
| $\alpha_{s2}$ -casein | TDAPSFSDIPNPIGSENSEK      | 174-193 | 171-185; 173-194 | 1.76E+07 | 1.15E+08 | 5.57E+07 | Unmodified                     |
|                       | TDAPSFSDIPNPIGSENSEKT     | 174-194 | 171-185; 173-194 | 5.19E+06 | 3.18E+07 | 1.02E+07 | Unmodified                     |
|                       | YQGPIVLNPWDQV             | 100-112 | 105-114          | 4.30E+07 | 1.10E+07 | 2.60E+08 | Unmodified                     |
|                       | YQGPIVLNPWDQVK            | 100-113 | 105-114          | 5.29E+06 |          | 7.59E+08 | Lactosylation                  |
|                       | QGPIVLNPWDQV              | 101-112 | 105-114          | 6.50E+07 | 1.09E+08 | 1.31E+08 | Unmodified                     |
| $\beta$ -casein       | QGPIVLNPWDQVK             | 101-113 | 105-114          | 2.93E+06 |          | 2.31E+08 | Lactosylation                  |
|                       | EELNVPGEIVESL             | 4-16    | 1-16             | 2.21E+07 | 2.46E+07 | 8.93E+06 | Phosphorylation                |
|                       | INKKIEKFQSEEQQTDELQDK     | 26-48   | 25-50            |          |          | 4.31E+07 | Phosphorylation, Lactosylation |
|                       | KIEKFQSEEQQTDELQDKIHP     | 29-51   | 25-50            | 5.51E+06 |          | 9.03E+07 | Phosphorylation, Lactosylation |
|                       | IEKFQSEEQQTDELQDKIHP      | 30-51   | 25-50            | 5.99E+07 | 3.18E+07 | 2.03E+08 | Phosphorylation, Lactosylation |
|                       | FQSEEQQTDELQDKIHPF        | 33-52   | 45-54            | 6.00E+06 | 3.83E+07 |          | Phosphorylation                |
|                       | QTEDELQDKIHPF             | 40-52   | 45-54            |          | 8.28E+06 |          | Unmodified                     |
|                       | QTEDELQDKIHPFA            | 40-53   | 45-54            |          |          | 6.53E+07 | Lactosylation                  |
|                       | TEDELQDKIHPF              | 41-52   | 45-54            | 2.22E+07 | 5.85E+07 | 1.94E+07 | Unmodified                     |
|                       | TEDELQDKIHPFA             | 41-53   | 45-54            |          | 1.65E+07 | 4.61E+07 | Unmodified, Lactosylation      |
|                       | QDKIHPFA                  | 46-53   | 45-54            | 2.91E+08 | 1.48E+08 | 1.85E+08 | Unmodified                     |
|                       | QSLVYPFGPIPN              | 56-68   | 55-70            | 9.38E+08 | 1.04E+09 | 1.23E+09 | Unmodified                     |
|                       | QSLVYPFGPIPNS             | 56-69   | 55-70            | 2.50E+07 | 2.61E+07 | 4.70E+07 | Unmodified                     |
|                       | SLVYPFGPIPNS              | 57-69   | 55-70            | 5.53E+07 | 1.01E+08 | 6.95E+07 | Unmodified                     |
|                       | NSLPQNIPPLTQTPVVVPPFLQPEV | 68-92   | 83-92            | 1.73E+07 | 8.40E+06 | 6.44E+07 | Unmodified                     |
|                       | SLPQNIPPLTQTPVVVPPFLQP    | 69-90   | 83-92            | 9.03E+06 | 5.56E+06 | 1.61E+07 | Unmodified                     |
|                       | SLPQNIPPLTQTPVVVPPFLQPE   | 69-91   | 83-92            | 4.14E+07 | 4.43E+07 | 3.83E+07 | Unmodified                     |
|                       | SLPQNIPPLTQTPVVVPPFLQPEV  | 69-92   | 83-92            | 1.05E+09 | 7.36E+08 | 1.71E+09 | Unmodified, Deamidation        |
|                       | LPQNIPPLTQTPVVVPPFLQPEV   | 70-92   | 83-92            | 3.67E+07 | 2.71E+07 | 6.88E+07 | Unmodified                     |
|                       | QNIPPLTQTPVVVPPFLQPEV     | 72-92   | 83-92            | 7.60E+06 | 4.16E+06 | 1.21E+07 | Unmodified                     |
|                       | NIPPLTQTPVVVPPFLQP        | 73-90   | 83-92            | 2.10E+07 | 1.63E+07 | 2.41E+07 | Unmodified                     |
|                       | NIPPLTQTPVVVPPFLQPE       | 73-91   | 83-92            | 8.77E+07 | 7.92E+07 | 6.09E+07 | Unmodified                     |
|                       | NIPPLTQTPVVVPPFLQPEV      | 73-92   | 83-92            | 1.45E+09 | 7.79E+08 | 1.22E+09 | Unmodified                     |
|                       | NIPPLTQTPVVVPPFLQPEVMG    | 73-94   | 83-92            | 1.71E+07 | 1.31E+07 | 2.76E+07 | Unmodified                     |

|                     |         |         |          |          |          |                              |
|---------------------|---------|---------|----------|----------|----------|------------------------------|
| IPPLTQTPVVVPPFLQPEV | 74-92   | 83-92   | 5.80E+07 | 5.18E+07 | 1.16E+08 | Unmodified                   |
| PPLTQTPVVVPPFLQPEV  | 75-92   | 83-92   | 8.31E+06 | 5.52E+06 |          | Unmodified                   |
| TQTPVVVPPFLQPEV     | 78-92   | 83-92   | 2.34E+08 | 2.73E+08 | 1.47E+08 | Unmodified                   |
| QTPVVVPPFLQP        | 79-90   | 83-92   | 7.30E+07 | 4.23E+07 | 2.50E+07 | Unmodified                   |
| QTPVVVPPFLQPE       | 79-91   | 83-92   | 2.06E+07 | 1.23E+07 | 2.03E+07 | Unmodified                   |
| QTPVVVPPFLQPEV      | 79-92   | 83-92   | 4.17E+08 | 2.45E+08 | 6.43E+08 | Unmodified,<br>Deamidation   |
| QTPVVVPPFLQPEVMG    | 79-94   | 83-92   | 7.39E+06 | 6.53E+06 | 1.61E+07 | Unmodified                   |
| TPVVVPPFLQP         | 80-90   | 83-92   | 5.35E+07 | 2.01E+07 | 9.39E+06 | Unmodified                   |
| TPVVVPPFLQPEV       | 80-92   | 83-92   | 1.14E+08 | 1.04E+08 | 6.29E+07 | Unmodified                   |
| PVVVPPFLQP          | 81-90   | 83-92   | 4.06E+07 | 1.39E+07 | 3.60E+07 | Unmodified                   |
| PVVVPPFLQPE         | 81-91   | 83-92   | 2.82E+08 | 9.53E+07 | 1.48E+08 | Unmodified                   |
| PVVVPPFLQPEV        | 81-92   | 83-92   | 3.35E+07 | 2.00E+09 | 5.17E+07 | Unmodified,<br>Deamidation   |
| PVVVPPFLQPEVM       | 81-93   | 83-92   | 3.98E+07 | 3.26E+06 | 1.26E+07 | Unmodified                   |
| PVVVPPFLQPEVMG      | 81-94   | 83-92   | 1.55E+08 | 3.72E+07 | 1.52E+08 | Unmodified                   |
| VVVPPFLQPEV         | 82-92   | 83-92   | 6.41E+07 | 3.72E+07 | 5.65E+07 | Unmodified                   |
| VVPPFLQPE           | 83-91   | 83-92   | 3.83E+08 | 4.72E+08 | 1.68E+08 | Unmodified                   |
| VVPPFLQPEV          | 83-92   | 83-92   | 7.23E+09 | 9.13E+09 | 5.90E+09 | Unmodified,<br>Deamidation   |
| VVPPFLQPEVMG        | 83-94   | 83-92   | 1.28E+08 | 1.57E+08 | 1.36E+08 | Unmodified                   |
| VPPFLQPEV           | 84-92   | 83-92   | 1.30E+07 | 1.01E+07 | 6.93E+06 | Unmodified                   |
| PPFLQPEV            | 85-92   | 83-92   | 2.55E+08 | 2.49E+08 | 2.19E+08 | Unmodified                   |
| HKEMPFKYPVEP        | 106-118 | 107-120 | 3.07E+06 | 3.50E+06 | 3.28E+07 | Lactosylation                |
| HKEMPFKYPVEPF       | 106-119 | 107-120 |          | 2.40E+07 | 3.33E+07 | Unmodified,<br>Lactosylation |
| EMPFKYPVEPF         | 108-119 | 107-120 | 2.89E+06 | 1.90E+08 | 2.28E+09 | Unmodified,<br>Lactosylation |
| WMHQPHQLPPTVMFPPQS  | 143-161 | 149-164 |          | 6.31E+06 |          | Unmodified                   |
| MHQPHQLPPTVMFPPQS   | 144-161 | 149-164 | 1.00E+08 | 7.57E+08 |          | Unmodified                   |
| MHQPHQLPPTVMFPPQSV  | 144-162 | 149-164 | 1.96E+08 | 1.09E+09 | 3.68E+07 | Unmodified                   |
| HQPHQLPPTVMFPPQS    | 145-161 | 149-164 | 2.29E+07 | 2.61E+08 |          | Unmodified                   |
| HQPHQLPPTVMFPPQSV   | 145-162 | 149-164 | 1.03E+08 | 5.74E+08 | 8.22E+06 | Unmodified                   |
| QPHQLPPTVMFPPQSV    | 146-162 | 149-164 |          | 3.52E+06 |          | Unmodified                   |
| QLPPTVMFPPQS        | 149-161 | 149-164 |          | 5.99E+07 | 1.28E+06 | Unmodified                   |
| QLPPTVMFPPQSV       | 149-162 | 149-164 | 1.85E+07 | 1.22E+08 | 2.83E+06 | Unmodified                   |

|                        |                     |         |         |                 |                 |                 |                                      |
|------------------------|---------------------|---------|---------|-----------------|-----------------|-----------------|--------------------------------------|
| κ-casein               | MAIPPKKNQDKTEIPTINT | 106-124 | 111-126 |                 |                 | 1.72E+07        | Lactosylation                        |
|                        | KNQDKTEIPTINT       | 112-124 | 111-126 | 8.11E+08        | 2.74E+08        | 3.78E+08        | Unmodified,<br>Lactosylation         |
| β-Lg                   | LIVTQTMKGLDIQK      | 1-14    | 1-16    |                 |                 | 3.06E+06        | CML                                  |
|                        | VRTPEVDDEALEKFDK    | 123-138 | 121-140 | 2.72E+09        | 5.12E+07        | 1.46E+09        | Unmodified,<br>Lactosylation,<br>CML |
|                        | VRTPEVDDEALEKFDKA   | 123-139 | 121-140 | 5.50E+07        |                 | 2.24E+08        | Unmodified,<br>Lactosylation         |
|                        | RTPEVDDEALEKFDKA    | 124-139 | 121-140 | 9.64E+06        |                 | 4.21E+06        | Unmodified                           |
|                        | TPEVDDEALEKFDKAL    | 125-140 | 121-140 | 2.34E+07        |                 | 1.43E+09        | Unmodified,<br>Lactosylation,<br>CML |
|                        | TPEVDDEALEKFDKALK   | 125-141 | 121-140 | 4.28E+07        |                 | 1.28E+08        | Unmodified,<br>Lactosylation         |
| α-La                   | KILDKVGI            | 94-101  | 93-102  | 4.55E+07        | 7.83E+07        | 2.37E+07        | Unmodified                           |
|                        | KILDKVGIN           | 94-102  | 93-102  | 1.27E+08        | 2.05E+08        | 7.91E+07        | Unmodified,<br>CML                   |
|                        | ILDKVGIN            | 95-102  | 93-102  | 3.20E+08        | 4.92E+08        | 5.14E+08        | Unmodified,<br>CML                   |
|                        | ILDKVGINY           | 95-103  | 93-102  |                 | 3.24E+07        |                 | Unmodified                           |
| <b>Count</b>           |                     |         |         | <b>73</b>       | <b>84</b>       | <b>77</b>       |                                      |
| <b>Total Intensity</b> |                     |         |         | <b>3.04E+10</b> | <b>3.48E+10</b> | <b>2.91E+10</b> |                                      |

Table S4: Bioactive peptides identified in the filtered intestinal digests by use of the milk bioactive peptide database (MBPDB). An infant formula model system remained either unheated (UH), was wet heated for 40 min (WH-40) or dry heated for 72h (DH-72) and all samples were digested by use of an *in vitro* infant digestion model. Amino acid (AA) position provides the position of the peptide that was identical to a peptide in the MBPDB without the signal peptide. Modification indicates if the peptide was detected in the digest in unmodified, phosphorylated, deamidation modified, lactosylated, or carboxymethyllysine (CML) modified form.

| Protein of origin     | Peptide            | AA position | Bioactive function                                                                                                                                                                                                                      | Intensity UH | Intensity WH-40 | Intensity DH-72 | Modification                               |
|-----------------------|--------------------|-------------|-----------------------------------------------------------------------------------------------------------------------------------------------------------------------------------------------------------------------------------------|--------------|-----------------|-----------------|--------------------------------------------|
| $\alpha_{s1}$ -casein | FVAPFPEVFG         | 24-33       | ACE-inhibitory                                                                                                                                                                                                                          | 5.47E+08     | 3.49E+08        | 8.81E+08        | Unmodified                                 |
|                       | DIGSESTEDQAMEDIK   | 43-58       | Promotes calcium uptake                                                                                                                                                                                                                 | 3.31E+07     | 7.22E+06        | 8.13E+06        | Phosphorylation                            |
|                       | YKVPQLEIVPNSAEER   | 104-119     | Promotes calcium uptake                                                                                                                                                                                                                 | 1.02E+08     | 1.35E+09        | 2.78E+07        | Phosphorylation                            |
|                       | SDIPNPIGSENSEK     | 180-193     | Antimicrobial                                                                                                                                                                                                                           | 3.90E+08     | 1.11E+07        | 1.02E+09        | Unmodified, Phosphorylation, Lactosylation |
| $\alpha_{s2}$ -casein | NMAINPSK           | 25-32       | ACE-inhibitory                                                                                                                                                                                                                          | 6.02E+07     | 3.82E+07        | 3.18E+07        | Unmodified, Phosphorylation                |
|                       | ALNEINQFYQK        | 81-91       | ACE-inhibitory                                                                                                                                                                                                                          |              | 6.99E+06        |                 | Unmodified                                 |
|                       | VPITPT             | 117-122     | DPP-IV Inhibitory                                                                                                                                                                                                                       | 3.34E+08     | 1.35E+08        | 3.28E+08        | Unmodified                                 |
| $\beta$ -casein       | LNVPGEIVE          | 6-14        | ACE-inhibitory                                                                                                                                                                                                                          | 3.58E+07     |                 | 3.05E+07        | Unmodified                                 |
|                       | NVPGEIVESL         | 7-16        | Antioxidant                                                                                                                                                                                                                             | 7.39E+07     | 9.53E+07        | 1.01E+08        | Phosphorylation                            |
|                       | FQSEEQQTDELQDK     | 33-48       | Promotes calcium uptake                                                                                                                                                                                                                 | 9.68E+08     | 8.37E+08        | 1.16E+09        | Unmodified, Phosphorylation, Deamidation   |
|                       | FQSEEQQTDELQDKIHFP | 33-52       | Promotes calcium uptake                                                                                                                                                                                                                 | 6.00E+06     | 3.83E+07        |                 | Phosphorylation                            |
|                       | VYPFPGPI           | 59-66       | PEP-inhibitory                                                                                                                                                                                                                          | 6.92E+07     | 4.91E+07        | 3.63E+07        | Unmodified                                 |
|                       | VYPFPGPIP          | 59-68       | Antioxidant, ACE-inhibitory                                                                                                                                                                                                             | 4.31E+09     | 3.28E+09        | 3.22E+09        | Unmodified, Deamidation                    |
|                       |                    |             | Satiety, Reduces pancreas MDA level, Opioid, Increases MUC5A expression, Increases MUC3 expression, Increases MUC2 expression, Increases jejunal mucus secretion, immunomodulatory, Anxiolytic, Anticancer, ACE-inhibitory, Antioxidant |              |                 |                 |                                            |
|                       | YFPFPGPI           | 60-66       |                                                                                                                                                                                                                                         | 9.30E+07     | 1.36E+08        | 4.74E+07        | Unmodified                                 |
|                       | YFPFPGPIP          | 60-68       | DPP-IV Inhibitory, ACE-inhibitory, Antioxidant                                                                                                                                                                                          | 3.25E+08     | 3.76E+08        | 1.68E+08        | Unmodified                                 |
|                       | YFPFPGPIPNS        | 60-69       | Anti-anxiety                                                                                                                                                                                                                            | 2.61E+07     | 1.13E+07        | 5.94E+06        | Unmodified                                 |
|                       | PFPGPPIP           | 61-68       | ACE-inhibitory                                                                                                                                                                                                                          | 9.53E+08     | 7.58E+08        | 5.08E+08        | Unmodified                                 |
|                       | FPGPIP             | 62-68       | DPP-IV Inhibitory                                                                                                                                                                                                                       | 1.74E+06     | 5.30E+06        |                 | Unmodified                                 |



|          |                      |         |                                                                                  |          |          |          |                                             |
|----------|----------------------|---------|----------------------------------------------------------------------------------|----------|----------|----------|---------------------------------------------|
|          | PGIPN                | 63-68   | immunomodulatory, Anticancer, Anti-inflammatory, ACE-inhibitory                  | 6.20E+07 | 4.44E+07 | 5.71E+07 | Unmodified                                  |
|          | SLPQNIPPL            | 69-77   | DPP-IV Inhibitory                                                                | 2.07E+08 | 1.36E+08 | 1.82E+08 | Unmodified                                  |
|          | SLPQNIPPLTQTPVVPPF   | 69-87   | Anticancer                                                                       | 1.24E+08 | 1.08E+08 | 1.12E+08 | Unmodified                                  |
|          | LPQNIPPLT            | 70-78   | DPP-IV Inhibitory                                                                | 6.06E+06 | 3.61E+06 | 5.85E+06 | Unmodified                                  |
|          | NIPPLTQTPV           | 73-82   | ACE-inhibitory                                                                   | 6.66E+08 | 1.58E+09 | 4.72E+08 | Unmodified                                  |
|          | IPPLTQT              | 74-80   | DPP-IV Inhibitory                                                                | 3.11E+07 | 1.10E+07 | 4.03E+07 | Unmodified                                  |
|          | TPVVVPPFLQP          | 80-90   | ACE-inhibitory                                                                   | 5.35E+07 | 2.01E+07 | 9.39E+06 | Unmodified                                  |
|          | HKEMPPFK             | 106-113 | Antimicrobial                                                                    | 2.67E+09 | 1.41E+09 | 5.44E+08 | Unmodified, CML                             |
|          | FPKYPVEPF            | 111-119 | Antioxidant                                                                      | 2.49E+07 | 2.85E+07 | 1.94E+07 | Unmodified                                  |
|          | YPVEPF               | 114-119 | Opioid, Increases MUC4 expression, DPP-IV Inhibitory, Antioxidant, Antimicrobial | 7.02E+09 | 6.48E+09 | 4.93E+09 | Unmodified                                  |
|          | DVENLHLPLPL          | 129-139 | Antimicrobial                                                                    | 2.98E+06 | 1.82E+07 | 1.04E+07 | Unmodified                                  |
|          | WMHQPHQLPPT          | 143-154 | Anti-inflammatory, ACE-inhibitory                                                | 3.26E+09 | 8.51E+08 | 3.19E+09 | Unmodified                                  |
|          | HQPHQLPPT            | 145-154 | ACE-inhibitory                                                                   | 3.78E+09 | 1.52E+09 | 2.11E+09 | Unmodified                                  |
|          | HQPHQLPPTVMFPPQ      | 145-160 | Anti-inflammatory, ACE-inhibitory                                                | 5.74E+06 | 1.12E+08 |          | Unmodified                                  |
|          | SQSKVLPVPQ           | 166-175 | ACE-inhibitory                                                                   |          |          | 1.78E+07 | CML                                         |
|          | SKVLPVPQ             | 168-175 | ACE-inhibitory                                                                   | 2.10E+07 | 8.81E+06 | 1.32E+07 | Unmodified                                  |
|          | LYQEPVLGPVR          | 192-202 | Anti-inflammatory, ACE-inhibitory                                                | 3.40E+07 | 9.52E+07 | 3.80E+07 | Unmodified                                  |
|          | YQEPVLGPVR           | 193-202 | ACE-inhibitory, Immunomodulatory, Antithrombotic, Antioxidant, Anti-inflammatory | 8.83E+07 | 2.57E+07 | 1.19E+08 | Unmodified                                  |
|          | YQEPVLGPVRGPFPIIV    | 193-209 | ACE-inhibitory, Immunomodulatory, Antithrombotic, Antioxidant, Anticancer        | 3.35E+06 | 3.76E+06 | 1.22E+07 | Unmodified                                  |
|          | QEPVLGPVRGPFPIIV     | 194-209 | ACE-inhibitory                                                                   |          | 8.40E+07 |          | Unmodified                                  |
|          | YPSYGLN              | 35-41   | Opioid                                                                           |          | 4.48E+07 | 2.51E+07 | Unmodified                                  |
| κ-casein | YYQQKPVA             | 42-49   | Antimicrobial                                                                    | 7.25E+08 | 1.22E+08 | 8.25E+08 | Unmodified, CML                             |
|          | MAIPPKKNQDKTEIPTINT  | 106-124 | Antimicrobial                                                                    |          |          | 1.72E+07 | Lactosylation                               |
|          | LIVTQTMK             | 1-8     | Cytotoxic                                                                        | 3.43E+08 | 3.71E+07 | 1.25E+08 | Unmodified                                  |
| β-Lg     | GLDIQKVAGT           | 9-18    | Antimicrobial                                                                    | 2.08E+08 | 5.91E+06 | 8.86E+09 | Unmodified, Deamidation, Lactosylation, CML |
|          | DAQSAPLRVY           | 33-42   | ACE-inhibitory                                                                   |          |          | 4.08E+07 | Unmodified                                  |
|          | VYVEELKPTPEGDLEILLQK | 41-60   | Hypocholesterolemic                                                              | 5.65E+06 | 8.71E+05 | 7.24E+06 | Unmodified                                  |

|      |                            |         |                                                                                               |                 |                 |                 |                                      |
|------|----------------------------|---------|-----------------------------------------------------------------------------------------------|-----------------|-----------------|-----------------|--------------------------------------|
|      | LKPTPEGDL                  | 46-54   | DPP-IV Inhibitory                                                                             | 2.33E+07        | 4.24E+08        | 1.84E+07        | Unmodified                           |
|      | LKPTPEGDLE                 | 46-55   | DPP-IV Inhibitory                                                                             | 2.67E+07        | 3.18E+08        | 1.65E+07        | Unmodified                           |
|      | IDALNENK                   | 84-91   | Stimulates proliferation, Antimicrobial                                                       | 1.13E+08        | 1.37E+08        | 1.41E+08        | Unmodified                           |
|      | VLVLDTDYK                  | 92-100  | DPP-IV Inhibitory, Antimicrobial                                                              | 8.06E+08        | 1.47E+08        | 5.46E+08        | Unmodified,<br>Lactosylation         |
|      | VLDTDYK                    | 94-100  | ACE-inhibitory                                                                                | 6.66E+09        | 1.30E+09        | 8.25E+09        | Unmodified,<br>Lactosylation         |
|      | TPEVDDEALEK                | 125-135 | DPP-IV Inhibitory, Antimicrobial                                                              | 3.74E+10        | 1.92E+10        | 3.69E+10        | Unmodified,<br>Lactosylation,<br>CML |
|      | ALPMHIR                    | 142-148 | Stimulates proliferation, Reduces<br>vasoconstrictor endothelin-1 release, ACE-<br>inhibitory | 1.74E+08        | 1.63E+07        | 6.88E+07        | Unmodified                           |
|      | LSFNPTQ                    | 149-155 | ACE-inhibitory                                                                                | 1.70E+07        |                 | 2.11E+07        | Deamidation                          |
|      | GYGGVSLPEW                 | 17-26   | ACE-inhibitory                                                                                | 1.89E+08        |                 | 2.52E+08        | Unmodified                           |
|      | VSLPEW                     | 21-26   | ACE-inhibitory                                                                                | 3.68E+08        | 7.46E+08        | 4.59E+08        | Unmodified                           |
| α-La | IWCKDDQNPH                 | 59-68   | Antioxidant                                                                                   |                 | 2.51E+06        |                 | Unmodified                           |
|      | ILDKVGINY                  | 95-103  | DPP-IV Inhibitory                                                                             |                 | 3.24E+07        |                 | Unmodified                           |
|      | <b>Count</b>               |         |                                                                                               | <b>49</b>       | <b>51</b>       | <b>50</b>       |                                      |
|      | <b>Total<br/>Intensity</b> |         |                                                                                               | <b>7.35E+10</b> | <b>4.25E+10</b> | <b>7.60E+10</b> |                                      |

Table S5: Protein concentrations of intestinal digests before and after filtration of the digests by centrifugal filtration with a 10 kDa molecular weight cut off. An infant formula model system remained unheated (UH) and was digested by use of *an in vitro* infant digestion model. Water instead of the infant formula model system was digested with the *in vitro* digestion model to obtain a control digest.

|                                                    | <b>UH</b> | <b>Control digest</b> | <b><math>\Delta</math> UH – Control digest</b> |
|----------------------------------------------------|-----------|-----------------------|------------------------------------------------|
| Protein concentration<br>before filtration (mg/ml) | 6.47      | 2.60                  | 3.87                                           |
| Protein concentration<br>after filtration (mg/ml)  | 3.91      | 1.25                  | 2.66                                           |
| Protein recovery (%)                               | 60        | 48                    | 69                                             |

Table S6: HLA-II epitopes predicted by the use of the IEDB MHC Class II Binding Prediction tool at the basolateral side after transport across a 21-days differentiated Caco-2 or Caco-2/HT29-MTX-E12 (90/10) monolayer. An infant formula model system remained either unheated (UH), was wet heated for 40 min (WH-40) or dry heated for 72h (DH-72) and all samples were digested by use of an *in vitro* infant digestion model and filtered before the intestinal digests were applied to the Caco-2 and HT29-MTX-E12 cells for 6h. Amino acid (AA) position provides the position of the peptide containing an HLA epitope in the protein without the signal peptide. Modification indicates if the peptide was detected in the digest in unmodified, phosphorylated, deamidation modified, lactosylated, or carboxymethyllysine (CML) modified form. ND: not detected.

| Protein of origin                        | Peptide        | AA position | HLA gene       | Intensity Caco-2 |           |                 | Intensity Caco-2 & HT29-MTX-E12 |                 |                 | Modification                |
|------------------------------------------|----------------|-------------|----------------|------------------|-----------|-----------------|---------------------------------|-----------------|-----------------|-----------------------------|
|                                          |                |             |                | UH               | WH-40     | DH-72           | UH                              | WH-40           | DH-72           |                             |
| $\alpha_{S1}$ -casein                    | LEIVPNSAEER    | 109-119     | HLA-DR         |                  |           |                 | 1.33E+06                        | 5.13E+06        |                 | Unmodified, Phosphorylation |
| $\alpha_{S2}$ -casein                    | NMAINPSKENL    | 25-35       | HLA-DR         |                  |           |                 | 4.42E+05                        |                 |                 | Phosphorylation             |
|                                          | QGPIVLNPWDQVK  | 101-113     | HLA-DR, HLA-DP |                  |           |                 |                                 |                 | 7.55E+05        | Lactosylation               |
| $\beta$ -casein                          | PVVVPPFLQPE    | 81-91       | HLA-DP         |                  |           |                 | 2.92E+05                        |                 | 2.79E+05        | Unmodified                  |
|                                          | SLSQSKVLPVPQ   | 164-175     | HLA-DR, HLA-DQ | 3.83E+05         |           | 1.13E+07        |                                 | 6.34E+05        | 3.90E+07        | Lactosylation, CML          |
| $\beta$ -Lg                              | EVDDEALEKFD    | 127-137     | HLA-DQ         | 4.96E+06         |           | 2.55E+06        | 1.65E+07                        | 1.49E+06        | 8.28E+06        | Unmodified                  |
| GRIP and coiled-coil domain containing 2 | IDQLKLKLQDTQNS | 1358-1371   | HLA-DR         |                  |           |                 | 1.47E+06                        |                 | 6.29E+05        | Deamidation, CML            |
| <b>Count</b>                             |                |             |                | <b>2</b>         | <b>ND</b> | <b>2</b>        | <b>5</b>                        | <b>3</b>        | <b>5</b>        |                             |
| <b>Total Intensity</b>                   |                |             |                | <b>5.35E+06</b>  | <b>ND</b> | <b>1.38E+07</b> | <b>2.00E+07</b>                 | <b>7.25E+06</b> | <b>4.90E+07</b> |                             |

Table S7: Linear IgE epitopes predicted at the basolateral side after transport across a 21-days differentiated Caco-2 or Caco-2/HT29-MTX-E12 (90/10) monolayer. An infant formula model system remained either unheated (UH), was wet heated for 40 min (WH-40) or dry heated for 72h (DH-72) and all samples were digested by use of an *in vitro* infant digestion model and filtered before the intestinal digests were applied to the Caco-2 and HT29-MTX-E12 cells for 6h. Amino acid (AA) position provides the position of the peptide containing an HLA epitope in the protein without the signal peptide. Modification indicates if the peptide was detected in the digest in unmodified, phosphorylated, deamidation modified, lactosylated, or carboxymethyllysine (CML) modified form. ND: not detected.

| Protein of origin     | Peptide                  | AA position | IgE epitope position | Intensity Caco-2 |       |       | Intensity Caco-2 & HT29-MTX-E12 |          |          | Modification                |
|-----------------------|--------------------------|-------------|----------------------|------------------|-------|-------|---------------------------------|----------|----------|-----------------------------|
|                       |                          |             |                      | UH               | WH-40 | DH-72 | UH                              | WH-40    | DH-72    |                             |
| $\alpha_{S1}$ -casein | LEIVPNSAEER              | 109-119     | 109-120              |                  |       |       | 1.33E+06                        | 5.13E+06 |          | Unmodified, Phosphorylation |
|                       | EIVPNSAEER               | 110-119     | 109-120              | 3.19E+07         |       |       | 1.30E+08                        | 3.22E+07 | 1.91E+08 | Unmodified, Phosphorylation |
|                       | TDAPSFSDIPNPI            | 174-186     | 171-185              |                  |       |       |                                 | 7.51E+06 |          | Unmodified                  |
| $\alpha_{S2}$ -casein | QGPIVLNPWDQVK            | 101-113     | 105-114              |                  |       |       |                                 |          | 7.55E+05 | Lactosylation               |
| $\beta$ -casein       | QSLVYPFGPIPN             | 56-68       | 55-70                |                  |       |       |                                 |          | 8.13E+05 | Unmodified                  |
|                       | SLPQNIPPLTQTPVVVPPFLQPE  | 69-91       | 83-92                |                  |       |       | 2.78E+05                        |          |          | Unmodified                  |
|                       | SLPQNIPPLTQTPVVVPPFLQPEV | 69-92       | 83-92                |                  |       |       |                                 | 2.08E+06 | 4.11E+06 | Unmodified                  |
|                       | NIPPLTQTPVVVPPFLQPE      | 73-91       | 83-92                |                  |       |       | 3.17E+05                        | 4.46E+05 | 5.06E+05 | Unmodified                  |
|                       | NIPPLTQTPVVVPPFLQPEV     | 73-92       | 83-92                |                  |       |       | 8.16E+06                        | 9.57E+06 | 1.06E+07 | Unmodified                  |
|                       | NIPPLTQTPVVVPPFLQPEVMG   | 73-94       | 83-92                |                  |       |       |                                 |          | 2.11E+05 | Unmodified                  |
|                       | IPPLTQTPVVVPPFLQPEV      | 74-92       | 83-92                |                  |       |       | 4.04E+05                        | 4.16E+05 | 7.85E+05 | Unmodified                  |
|                       | TQTPVVVPPFLQPEV          | 78-92       | 83-92                | 4.64E+05         |       |       | 9.99E+05                        | 8.54E+05 | 9.66E+05 | Unmodified                  |
|                       | QTPVVVPPFLQPEV           | 79-92       | 83-92                |                  |       |       | 8.33E+05                        | 8.46E+05 | 1.52E+06 | Unmodified                  |
|                       | PVVVPPFLQPE              | 81-91       | 83-92                |                  |       |       | 2.92E+05                        |          | 2.79E+05 | Unmodified                  |
|                       | PVVVPPFLQPEV             | 81-92       | 83-92                | 1.58E+07         |       |       | 4.58E+07                        | 1.00E+07 | 6.74E+07 | Unmodified                  |
|                       | PVVVPPFLQPEVMG           | 81-94       | 83-92                |                  |       |       |                                 |          | 5.54E+05 | Unmodified                  |
|                       | VVVPPFLQPEV              | 82-92       | 83-92                |                  |       |       |                                 |          | 1.27E+06 | Unmodified                  |
|                       | PPFLQPEV                 | 85-92       | 83-92                |                  |       |       | 4.76E+05                        |          | 6.78E+05 | Unmodified                  |
|                       | HQPHQPLPPTVMFPPQS        | 145-161     | 149-164              |                  |       |       |                                 | 2.92E+05 |          | Unmodified                  |
|                       | HQPHQPLPPTVMFPPQSV       | 145-162     | 149-164              |                  |       |       |                                 | 5.15E+06 |          | Unmodified                  |
| $\beta$ -Lg           | VRTPEVDDEALEKFDK         | 123-138     | 121-140              |                  |       |       | 3.29E+06                        |          |          | Unmodified                  |

|                            |                 |           |           |                 |                 |                 |
|----------------------------|-----------------|-----------|-----------|-----------------|-----------------|-----------------|
| <b>Count</b>               | <b>3</b>        | <b>ND</b> | <b>ND</b> | <b>12</b>       | <b>12</b>       | <b>15</b>       |
| <b>Total<br/>Intensity</b> | <b>4.82E+07</b> | <b>ND</b> | <b>ND</b> | <b>1.92E+08</b> | <b>7.44E+07</b> | <b>2.82E+08</b> |

Table S8: Bioactive peptides identified by use of the milk bioactive peptide database (MBPDB) at the basolateral side after transport across a 21-days differentiated Caco-2 or Caco-2/HT29-MTX-E12 (90/10) monolayer. An infant formula model system remained either unheated (UH), was wet heated for 40 min (WH-40) or dry heated for 72h (DH-72) and all samples were digested by use of an *in vitro* infant digestion model and filtered before the intestinal digests were applied to the Caco-2 and HT29-MTX-E12 cells for 6h. Amino acid (AA) position provides the position of the peptide containing an HLA epitope in the protein without the signal peptide. Modification indicates if the peptide was detected in the digest in unmodified, phosphorylated, deamidation modified, lactosylated, or carboxymethyllysine (CML) modified form.

| Protein of origin     | Peptide            | AA position | Bioactive function                                                               | Intensity Caco-2 |          |          | Intensity Caco-2 & HT29-MTX-E12 |          |          | Modification                |
|-----------------------|--------------------|-------------|----------------------------------------------------------------------------------|------------------|----------|----------|---------------------------------|----------|----------|-----------------------------|
|                       |                    |             |                                                                                  | UH               | WH-40    | DH-72    | UH                              | WH-40    | DH-72    |                             |
| $\alpha_{S1}$ -casein | SDIPNPIGSENSEK     | 180-193     | Antimicrobial                                                                    |                  |          |          | 7.30E+05                        |          |          | Unmodified                  |
|                       | FQSEEQQTDELQDK     | 33-48       | Promote calcium uptake                                                           | 5.73E+06         | 1.41E+06 | 4.65E+06 | 3.71E+06                        | 1.03E+06 | 3.57E+06 | Unmodified, Phosphorylation |
|                       | VYPFGPIP           | 59-67       | PEP-inhibitory                                                                   | 1.96E+06         |          |          | 4.98E+06                        | 2.72E+06 | 6.99E+06 | Unmodified                  |
|                       | SLPQNIPPLTQTPVVPPF | 69-87       | Anticancer                                                                       |                  |          |          |                                 | 6.37E+05 | 1.00E+06 | Unmodified                  |
|                       | NIPPLTQTPV         | 73-82       | ACE-inhibitory                                                                   |                  |          |          | 2.34E+06                        | 3.09E+06 | 2.07E+06 | Unmodified                  |
|                       | IPPLTQT            | 74-80       | DPP-IV Inhibitory                                                                |                  |          |          | 4.61E+05                        |          | 6.92E+05 | Unmodified                  |
| $\beta$ -casein       | YPVEPF             | 114-119     | Opioid, Increases MUC4 expression, DPP-IV Inhibitory, Antioxidant, Antimicrobial |                  |          |          |                                 | 1.56E+06 |          | Unmodified                  |
|                       | WMHQPHQPLPPT       | 143-154     | Anti-inflammatory, ACE-inhibitory                                                | 8.16E+05         | 2.43E+05 | 6.73E+05 | 1.71E+06                        | 4.47E+05 | 3.90E+06 | Unmodified                  |
|                       | HQPHQPLPPT         | 145-154     | ACE-inhibitory                                                                   | 2.50E+07         | 3.57E+06 | 1.58E+07 | 4.42E+07                        | 8.64E+06 | 5.85E+07 | Unmodified                  |
|                       | SQSKVLPVPQ         | 166-175     | ACE-inhibitory                                                                   |                  |          |          |                                 |          | 5.29E+06 | Lactosylation               |
|                       | VLPVPQ             | 170-175     | Inhibition of cholesterol solubility                                             | 2.47E+07         |          | 1.96E+07 | 5.64E+07                        | 2.85E+07 | 5.84E+07 | Unmodified                  |
|                       | QEPVLGPVRGPFPIIV   | 194-209     | ACE-inhibitory                                                                   |                  |          |          |                                 | 3.00E+05 |          | Unmodified                  |
| $\beta$ -Lg           | GLDIQKVAGT         | 9-18        | Antimicrobial                                                                    | 8.30E+05         |          |          | 2.12E+06                        | 4.45E+05 | 1.24E+08 | Lactosylation, CML          |
|                       | VLVLDTDYK          | 92-100      | DPP-IV Inhibitory, Antimicrobial                                                 |                  |          |          | 1.19E+06                        |          | 4.49E+05 | Unmodified                  |

|                            |             |         |                                     |                 |                 |                 |                 |                 |                 |                                      |
|----------------------------|-------------|---------|-------------------------------------|-----------------|-----------------|-----------------|-----------------|-----------------|-----------------|--------------------------------------|
| α-La                       | VLDTDYK     | 94-100  | ACE-inhibitory                      | 1.08E+07        |                 |                 | 2.28E+07        | 9.60E+05        | 5.16E+07        | Unmodified,<br>Lactosylation         |
|                            | TPEVDDEALEK | 125-135 | DPP-IV Inhibitory,<br>Antimicrobial | 4.89E+07        | 8.63E+05        | 2.15E+07        | 8.45E+07        | 1.33E+07        | 7.43E+07        | Unmodified,<br>Lactosylation,<br>CML |
|                            | GYGGVSLPEW  | 17-26   | ACE-inhibitory                      |                 |                 |                 |                 |                 | 1.94E+05        | Unmodified                           |
|                            | VSLPEW      | 21-26   | ACE-inhibitory                      |                 |                 |                 | 9.37E+05        | 1.24E+06        | 2.78E+06        | Unmodified                           |
| <b>Count</b>               |             |         |                                     | <b>8</b>        | <b>4</b>        | <b>5</b>        | <b>13</b>       | <b>13</b>       | <b>15</b>       |                                      |
| <b>Total<br/>Intensity</b> |             |         |                                     | <b>1.19E+08</b> | <b>6.08E+06</b> | <b>6.23E+07</b> | <b>2.26E+08</b> | <b>6.30E+07</b> | <b>3.94E+08</b> |                                      |



## References:

George, M. D., Wehkamp, J., Kays, R. J., Leutenegger, C. M., Sabir, S., Grishina, I., Dandekar, S. & Bevins, C. L. (2008). In vivo gene expression profiling of human intestinal epithelial cells: analysis by laser microdissection of formalin fixed tissues. *BMC genomics*, 9, 1-13.

Pan, Q., Tian, Y., Li, X., Ye, J., Liu, Y., Song, L., Yang, Y., Zhu, R., He, Y., Chen, L., Chen, W., Mao, X., Zhihong, P. & Wang, R. (2013). Enhanced Membrane-tethered Mucin 3 (MUC3) Expression by a Tetrameric Branched Peptide with a Conserved TFLK Motif Inhibits Bacteria Adherence. *Journal of Biological Chemistry*, 288(8), 5407-5416.

Shi, D., & Xi, X. X. (2021). Regulation of MUC6 methylation correlates with progression of gastric cancer. *Yonsei Medical Journal*, 62(11), 1005.

Suvarna, K. S., Layton, C., & Bancroft, J. D. (2013). Carbohydrates. In *Bancroft's theory and practice of histological techniques* (7th ed., p. 226). Elsevier Health Sciences.

Vandesompele, J., De Preter, K., Pattyn, F., Poppe, B., Van Roy, N., De Paepe, A., & Speleman, F. (2002). Accurate normalization of real-time quantitative RT-PCR data by geometric averaging of multiple internal control genes. *Genome Biology*, 3(7), 1-12. <https://doi.org/10.1186/GB-2002-3-7-RESEARCH0034>
